# 1 Localization and protein-protein interactions of protein 2 kinase CK2 suggest a chaperone-like activity is integral 3 to its function in *M. oryzae*

4 Lianhu Zhang<sup>1\*</sup>, Dongmei Zhang<sup>1\*</sup>, Yunyun Chen<sup>1</sup>, Wenyu Ye<sup>2</sup>, Qingyun Lin<sup>2</sup>, Guodong  
5 Lu<sup>1</sup>, Daniel J. Ebbole<sup>1,3</sup>, Stefan Olsson<sup>1,4,§</sup> & Zonghua Wang<sup>1,2,5§</sup>

6 <sup>1</sup>State Key Laboratory for Ecological Pest Control of Fujian and Taiwan Crops,  
7 College of Plant Protection, Fujian Agriculture and Forestry University, Fuzhou  
8 350002, China.

9 <sup>2</sup>College of Life Sciences, Fujian Agriculture and Forestry University, Fuzhou  
10 350002, China.

11 <sup>3</sup>Department of Plant Pathology and Microbiology, Texas A&M University, College  
12 Station, Texas 77843, U.S.A.

13 <sup>4</sup>Plant Immunity Center, Haixia Institute of Science and Technology, Fujian  
14 Agriculture and Forestry University, Fuzhou 350002, China.

15 <sup>5</sup>Minjing University, Fuzhou 350018, China.

16 \*These authors contributed equally to this work

17 § These authors jointly supervised the work

## 19 Abstract

20 CK2 is a constitutively active conserved serine/threonine kinase in eukaryotes. We  
21 characterized three components of the CK2 holoenzyme, CKa, CKb1 and CKb2, in  
22 the fungus *Magnaporthe oryzae*. The CKa encoding gene appears to be essential. All  
23 three CK2 components were localized with GFP fusions and both CKb components  
24 were needed for preferential cellular localization to the nucleolus and as structures at  
25 septal pores. A unique CK2 filament was prominent within appressoria. A pulldown  
26 experiment identified CKa interacting proteins with an overrepresentation of  
27 intrinsically unfolded proteins containing a CK2 phosphorylation motif for  
28 destabilizing and unfolding alpha helices. This suggests a role for CK2 in forming  
29 protein aggregates. Supporting this conclusion, we found that *CKa* expression and a  
30 key autophagy gene, *Atg8*, are strongly correlated, indicating that an increased  
31 removal of aggregates is needed with higher CKa expression.

32

## 33 **Introduction**

34 Since its discovery (Meggio & Pinna, 2003), the constitutive activity of CK2 and the  
35 increasing number of proteins it has been shown to phosphorylate have puzzled  
36 scientists (Ahmad, Wang, Unger, Slaton, & Ahmed, 2008; Götz & Montenarh, 2016;  
37 Meggio & Pinna, 2003). Indeed CK2 has been implicated in a wide range of cellular  
38 processes (Götz & Montenarh, 2016). The CK2 holoenzyme is a heterotetrameric  
39 structure consisting of 2 catalytic  $\alpha$ -units and 2 regulatory  $\beta$ -subunits (Ahmad et al.,  
40 2008). In mammals, there exist two different alpha subunits  $\alpha$  (a1) and  $\alpha'$  (a2) and  
41 the enzyme can contain any combination of  $\alpha$ -subunits ( $\alpha 1\alpha 1$ ,  $\alpha 1\alpha 2$ ,  $\alpha 2\alpha 2$ )  
42 combined with the  $\beta$ -subunits. In *Saccharomyces cerevisiae*, CK2 contains two  
43 different alpha- and two different  $\beta$ -subunits (b1 and b2) (Padmanabha, Chen-Wu,  
44 Arnot, & Glover, 1990). CK2 has been extensively studied in the budding yeast *S.*  
45 *cerevisiae* (Padmanabha et al., 1990), however, functions of CK2 involved in  
46 multicellularity might be obscured in yeast. For fungi, it has been reported that  
47 deletion of both catalytic subunits is lethal (Padmanabha et al., 1990; C. Wang et al.,  
48 2011) and some fungi, including *M. oryzae*, contain only one gene encoding CKa  
49 (Mehra et al., 2009). In comparison to yeast, filamentous fungi have different cell  
50 types that allow detailed exploration of cellular differentiation and multicellular  
51 development (Shlezinger, Goldfinger, & Sharon, 2012) and this, in combination with  
52 haploid life-cycles, well characterized genomes, and efficient methods for targeted  
53 gene replacement, makes fungi like *Magnaporthe oryzae* and *F. graminearum* good  
54 model systems for molecular studies of basic eukaryote functions including cell-cell  
55 communication (Cavinder, Sikhakolli, Fellows, & Trail, 2012; Ebbolle, 2007). As  
56 plant pathogens, developmental processes needed for symbiosis can also be explored.  
57 We focused our study on *M. oryzae* one of the most important rice crop pathogens  
58 worldwide (Dean et al., 2012).

59 Our results show that *M. oryzae* CK2 holoenzyme (MoCK2) accumulates in the  
60 nucleolus, localizes in structures near septal pores, and assembles to form a large ring  
61 structure perpendicular to the appressorium penetration pore, which we call the CK2-  
62 Holoenzyme Ring Structure (CK2-HRS). The large-scale structures formed by CK2  
63 protein kinase, combined with our finding of the interaction of CK2 with substrates  
64 associated with the location of CK2 enzyme aggregation, suggests that CK2 may  
65 control substrate stability and localization near their sites of action. Furthermore,  
66 CK2 interacts preferentially with proteins annotated as being intrinsically disordered.  
67 Taken together, this work provides further evidence supporting the view that one of  
68 the roles for the CK2 holoenzyme is to induce conformational changes in intrinsically  
69 disordered proteins.

70

## 71 **RESULTS**

### 72 **Deletion of MoCK2 components**

73 Using BLASTp and the protein sequences for the CK2 catalytic subunits of *S.*  
74 *cerevisiae*, CKa and CKa2 (encoded by *CKA1* and *CKA2*), and CKb1 and CKb2  
75 (encoded by *CKB1* and *CKB2*) (Padmanabha et al., 1990), we identified one MoCKa  
76 (MGG\_03696) and two MoCKb sequences (MoCKb1 = MGG\_00446, MoCKb2 =  
77 MGG\_05651) (Figure 1). Sequence alignments and phylogenetic analysis show that  
78 these proteins are highly conserved in different fungi (Figure 1 Supplement 1-4).  
79 Moreover, the phylogenetic analysis indicated that the two CKbs were in two  
80 separate evolutionary branches (Figure 1 Supplement 1).

81 We attempted targeted deletions of the three identified genes and succeeded in  
82 deleting the two *CKb* genes but not the *CKa* and then also saw that the conidial

83 morphology was different in the CKb mutants in that they had lower numbers of  
84 conidial compartments (Figure 2).

85

## 86 **Subcellular localization of CK2 subunits**

87 To assess the localization of the three CK2 subunit mutants, we constructed GFP  
88 fusions of all three proteins (Filhol et al., 2003) (GFP-MoCKa, GFP-MoCKb1 and  
89 GFP-MoCKb2) (Table 1). All three strains showed the same growth, morphology and  
90 pathogenicity (Figure 3) as the background strain Ku80. The CKa and CKb1&2  
91 fusion proteins localized to nuclei and prominently to nucleoli and, interestingly, to  
92 both sides of septal pores in hyphae (Figure 4 a-e) and conidia (Figure 4 Supplement  
93 1). We then tested if the localization to septa and nucleoli were dependent on the  
94 association with the other subunits of the holoenzyme. We had measured MoCKa  
95 expression in the two *MoCkb* mutants using qPCR and noted it was downregulated  
96 compared to the background strain Ku80 (Figure 5 a). Thus, we constructed strains  
97 that over-express GFP-CKa in the  $\Delta MoCkb1$  and  $\Delta MoCkb2$  deletion strains (43OE and  
98 53OE respectively, Figure 5 b-e) but this did not result in localization to septa (Figure  
99 4 f,g). However, Nucleolar localization of GFP-MoCKa was clear even in the  
100 *MoCKb1* and *MoCKb2* mutant backgrounds. To test if over-expression of any one of  
101 the CKb proteins could rescue the effect of the deletion of the other CKb we  
102 constructed GFP-CKb overexpression strains in the background strain Ku80 and both  
103 CKb mutants, GFP-CKb1 in  $\Delta MoCkb2$  (54OE-GFP) and GFP-CKb2 in  $\Delta MoCkb1$   
104 (45OE-GFP). The overexpression of either of the two CKbs in the background strain  
105 Ku80 showed normal localization to septa and nucleolus but the overexpression in  
106 the deletion strains could not rescue normal localization (Figure 4h,i and Figure 5  
107 Supplement 1). Furthermore, GFP-MoCKb1 appeared to localize to nuclei but not  
108 nucleoli in the *MoCKb2* mutant. Similarly, GFP-MoCKb2 also appeared to localize

109 to nuclei but not nucleoli in the *MoCKb1* mutant. Conidia morphology also changed  
110 in the  $\Delta Mockb2$  deletion mutants (Figure 2c), even if CKa was overexpressed as in  
111 43OE and 53OE (Figure 5), which restored some of the conidia formation and growth  
112 rate defects (Figure 5 ). These conidia mainly contained 2 nuclei instead of the  
113 normal 3 found in the background strain Ku80 (Figure 2c, Figure 5 d,e). Compared to  
114 the background strain Ku80, all mutants lacking one of the MoCK2b components had  
115 severely reduced or absent pathogenicity even if other MoCK2 components were  
116 over-expressed.

117

### 118 **Infection phenotypes of CKb deletions**

119 Deletion of CK2 genes has been shown to have effects on both growth and infection  
120 in *Fusarium* (Wang et al., 2011) and we also found this to be the case for *M. oryzae*  
121 (Figure 6 and Figure 6 Supplement 1). Conidiation was very limited or absent in  
122  $\Delta Mockb1$  and  $\Delta Mockb2$  deletion mutants thus we used mycelia plugs to test for  
123 infection (W. Liu et al., 2010; Talbot et al., 1996), and found that infection was strongly  
124 reduced or completely absent (Figure 6c).

125

### 126 **CKa localization in appressoria**

127 Since we found large effects in infection of the deletion of the CKb components we  
128 decided to investigate localization of CKa-GFP in the appressoria of the background  
129 strain Ku80 and the two CKb deletion mutants. Normal appressoria were only formed  
130 in the background strain Ku80 and in these, CK2 localizes to nuclei (Figure 7a top  
131 row and Figure 7 Supplement 1b), to the septa between the appressorium and the  
132 germ tube (Figure 7 Supplement 1) and also assembles a large ring structure  
133 perpendicular to the penetration pore (Figure 7 b-d, Figure 7 Supplement 1, Figure 7

134 Supplement 2 for ring size measurements, and movies associated with the images of  
135 Figure 7b-d, showing 3D rotations to visualize ring and the appressoria). MoCKa  
136 nuclear localization was present but ring structures were absent in appressoria formed  
137 by the two CK2b deletion mutants (Figure 7a middle and bottom row). As can be  
138 seen in Figure 7d, the CK2 Holoenzyme Ring Structure (CK2-HRS) is positioned  
139 perpendicular to the penetration pore where the F-actin-septin ring has been shown to  
140 form around the pore opening (Dagdaz et al., 2012) (Figure 7d and 8 schematic  
141 drawing).

142

### 143 **Identification of potential septal and nucleolar substrates for MoCK2 by GFP-** 144 **CKa pulldown**

145 The localization pattern suggested that CK2 may have substrates associated with  
146 septa and nucleolar function. To explore this, we performed co-immunoprecipitation  
147 to identify proteins interacting with CK2 using GFP-CKa as a "bait", and in addition  
148 to the bait, identified 1505 proteins (Supplementary File 1). We also searched the *M.*  
149 *oryzae* proteome for proteins containing the CK2 phosphorylation helix unfolding  
150 motif identified by Zetina (Zetina, 2001) using the FIMO tool at the MEMESuit  
151 website (<http://meme-suite.org/>) and found 1465 proteins (Supplementary File 2)  
152 with the motif, out of a total of 12827 proteins annotated for *M. oryzae*.

153 There is the risk of false positives in the pulldown. We estimated the number of false  
154 positives and removed 155 (10%) of the lower abundance proteins to arrive at a list of  
155 1350 CKa interacting proteins (see Methods). We found 275 of these proteins contain  
156 at least one unfolding motif for alpha helices. Thus, there is an overrepresentation of  
157 the motif among the pulldown proteins (Supplementary File 2) (P-value for the null  
158 hypothesis of same frequency as in the whole proteome =  $4 \times 10^{-19}$ , Fisher's Exact test)  
159 lending support for the proposed role for this motif as a target for CK2

160 phosphorylation and protein unfolding. As expected, the pulldown caught both CKb  
161 proteins.

162 Since CK2 locates to septa we looked for known septal proteins in the pulldown. All  
163 previously proteins identified by Dagas et al. (Dagdas et al., 2012) that are involved  
164 in appressorium pore development, were found in the pulldown as was a protein  
165 annotated as the main Woronin body protein, Hex1 (MGG\_02696). Since the  
166 Woronin body in Ascomycetes is tethered to the septal rim by Lah protein (Han, Jin,  
167 Maruyama, & Kitamoto, 2014; Ng, Liu, Lai, Low, & Jedd, 2009; Plamann, 2009) we  
168 searched for a homologue in *M. oryzae* and found a putative MoLah (MGG\_01625)  
169 with a similar structure as in *Aspergillus* (Han et al., 2014) that is also present in the  
170 pulldown. In addition to the Lah, 18 other intrinsically disordered septal pore  
171 associated proteins (Spa) were described for *Neurospora crassa* (Lai et al., 2012). We  
172 identified putative orthologs for 15 of the 18 Spa proteins in *M. oryzae*  
173 (Supplementary File 3). Of these putative MoSpa proteins, six were present in the  
174 CKa pulldown, Spa3 (MGG\_02701), Spa5 (MGG\_13498), Spa7 (MGG\_15285),  
175 Spa11 (MGG\_16445), Spa14 (MGG\_03714) and Spa 15 (MGG\_15226). Spa3, Spa5  
176 and Spa15 also contain the CK2 phosphorylation alpha helix unfolding motif  
177 (Supplementary File 1).

178 To further test the hypothesis that CK2 could interact with and possibly  
179 phosphorylate intrinsically unfolded proteins we used the FuncatDB  
180 (<http://mips.helmholtz-muenchen.de/funcatDB/>) to make a functional classification of  
181 the pulldown proteins including those containing the alpha helix unfolding motif  
182 (Zetina, 2001). We found strong overrepresentation for proteins involved in rRNA  
183 processing among the pulldown proteins containing the alpha helix unfolding motif  
184 as well as for proteins that bind to other proteins, DNA, and RNA (Supplementary  
185 File 4). These classes of proteins are enriched for intrinsically disordered proteins that  
186 can help create membraneless organelles, such as nucleoli (Wright & Dyson, 2015).

187 Since CK2 localizes to the nucleolus we were especially interested in the interaction  
188 of CK2 with nucleolar localized proteins. We identified homologues to the well  
189 described *S. cerevisiae* nucleolar proteins and found a total of 192 proteins in *M.*  
190 *oryzae* homologous to yeast nucleolar proteins (Supplementary File 5). We found 120  
191 (63%) of the nucleolar proteins in the pulldown and 60 of these (50%) had the alpha  
192 helix unfolding motif (Supplementary File 1 and 4). The nucleolar proteins were  
193 highly overrepresented in the pulldown (P-value for the null hypothesis of same  
194 frequency as in the whole proteome  $9E-43$  Fisher's Exact test) (Supplementary File 5)  
195 compared to the whole proteome as was also nucleolar proteins having the unfolding  
196 motif (P-value for the null hypothesis of same frequency as in the whole proteome  
197  $2E-13$  Fisher's Exact test) (Supplementary File 5).

198 Interestingly the pulldown proteins without the unfolding motif were strongly  
199 enriched (60 of 130 in the whole proteome, P-value for the null hypothesis of same  
200 frequency as in the whole proteome  $1.0E-29$ ) for proteins that are imported into  
201 mitochondria and involved in oxidative phosphorylation ("02.11 electron transport  
202 and membrane-associated energy conservation" category from Functat)  
203 (Supplementary File 4).

204 There was however no enrichment for specific pathogenicity related proteins and  
205 rather an underrepresentation of pathogenicity related proteins (Functat category  
206 32.05 disease, virulence and defence) (Supplementary File 4) and within the whole  
207 Functat category related to stress and defence (32 CELL RESCUE, DEFENSE AND  
208 VIRULENCE). The lack of association of pathogenicity related proteins with CK2  
209 may reflect the in vitro growth conditions of the experiment where pathogenicity  
210 related proteins would either not be expressed or not active. There was a  
211 considerable overrepresentation for proteins involved in the unfolded protein  
212 response (32.01.07 unfolded protein response) (e.g. ER quality control) which is



213 notable since an involvement of CK2 in protein import into the ER has been established  
214 (X. Wang & Johnsson, 2005).

215 Interestingly five putative S/T phosphatases (MGG\_03154, MGG\_10195,  
216 MGG\_00149, MGG\_03838, MGG\_06099) were in the pulldown set of proteins  
217 (Supplementary File 1). Conceivably these might de-phosphorylate CKa substrates as  
218 well as substrates of other kinases to expand the reach of CK2 in regulating the  
219 phosphoproteome. If that idea is correct, increased CK2 activity should also be  
220 followed by an increased activity of the phosphatases that dephosphorylate the  
221 proteins CK2 has phosphorylated. Thus, the expression of the phosphatases involved  
222 can be expected to be transcriptionally co-regulated with CKa. To evaluate this  
223 possibility, we downloaded expression data from a range of experiments with *M.*  
224 *oryzae* and plotted the expression of the phosphatases as a function of the CKa  
225 expression and found that two of the S/T phosphatases present in the pulldown were  
226 strongly correlated CKa (Figure 9).

227

## 228 **CK2 expression correlates with autophagy**

229 Since CK2 activity has the potential to favour protein-protein binding between  
230 intrinsically disordered proteins it consequently also has the potential to enhance  
231 protein aggregate formation of “garbage” that needs to be degraded through  
232 autophagy since these kinds of aggregates are too big for proteasome degradation  
233 (Wong & Cuervo, 2010). If this is the case CK2 upregulation should be accompanied  
234 by higher autophagy flux or at least there should not be low expression of key  
235 autophagy genes when CK2 expression is high (Wong & Cuervo, 2010). To test this  
236 hypothesis, we used the expression data we downloaded for *M. oryzae* and also for  
237 another fungal plant pathogen, *Fusarium graminearum*, that has rich transcriptomic  
238 data available (see methods).

239 For both fungi we plotted *CKa* versus *Atg8* expression across experiments. *Atg8* is a  
240 key autophagy protein for which its turnover rate can reflect autophagy flux  
241 (Klionsky et al., 2016). For both *M. oryzae* and *F. graminearum* we find a log-log  
242 linear relationship between the *CKa* expression and *Atg8* expression (Figure 9 with  
243 Supplements 1 and 2) across a large range of experiments supporting the hypothesis  
244 that autophagy activity is increasingly needed to remove protein aggregates  
245 stimulated to form by increasing levels of *CKa* and its activity in the cell.

246

## 247 **Discussion**

248 In contrast to *S. cerevisiae* (Padmanabha et al., 1990) and *F. graminearum* (C. Wang  
249 et al., 2011) but consistent with *N. crassa* (Mehra et al., 2009) we only found one  
250 *CKa* encoding gene in *M. oryzae*. In fungi where two different *CKa* genes are found  
251 deletion of both is lethal (Padmanabha et al., 1990; C. Wang et al., 2011), so it is  
252 rather expected that we were not able to obtain a  $\Delta MoCKa$  mutant.

253 The analysis of the *MoCKb* mutants and the localization of the GFP-labelled *MoCK2*  
254 proteins showed that all identified *MoCK2* components are needed for normal  
255 function and also normal localization. Localization to septa requires all three subunits,  
256 presumably as the holoenzyme. Mutation of either *CKb* subunit blocks nucleolar  
257 localization of the other *CKb* subunit. Surprisingly, nucleolar localization of *CKa* was  
258 observed in the *CKb* mutants. This shows that the holoenzyme is not required for  
259 *CKa* localization to the nucleolus. It seems likely that *CKb1* and *CKb2* must interact  
260 with each other in order to interact with *CKa*, and that *CKa* is required for movement  
261 of *CKb* subunits into the nucleolus as the holoenzyme.

262 The pattern of localization to septa (Figures 4) observed is remarkably similar to that  
263 displayed by the Woronin body tethering protein *AoLah* from *Aspergillus oryzae*  
264 (Figure 4b in (Han et al., 2014)). Pulldown experiments demonstrate that *CK2*

265 interacts with proteins that function in septum formation and function, including the  
266 MoLah ortholog, supporting the view that localization of the GFP-fusion proteins  
267 gives a proper representation of CK2 localization. Our results thus demonstrate that  
268 the MoCK2-holoenzyme assembles as a large complex near, and is perhaps tethered  
269 to, septa, possibly through binding to MoLah. Since septal pores in fungi are gated  
270 (Shen K-F., Osmani A. S., Govindaraghavan M., & Osmani S. A., 2014), as are gap  
271 junctions and plasmodesmata in animal and plant tissue, respectively (Ariazi et al.,  
272 2017; Kragler, 2013; Neijssen et al., 2005), CK2 has a potential to play a general role  
273 in this gating.

274

275 The crystal structure suggested that CK2 can form filaments and higher-order  
276 interactions between CK2 holoenzyme tetramer units, and based on this it has been  
277 predicted that autophosphorylation between the units could occur to down-regulate  
278 activity (Litchfield, 2003; Poole et al., 2005). Filament formation has been shown to  
279 occur *in vitro* (Glover, 1986; Seetoh, Chan, Matak-Vinković, & Abell, 2016; Valero  
280 et al., 1995) and *in vivo* (Hübner et al., 2014). Several forms of higher order  
281 interactions have been predicted, and it has been demonstrated that at least one of  
282 these has reduced kinase activity (Poole et al., 2005; Valero et al., 1995). However, in  
283 our localization experiments we cannot distinguish if the large structure is due to co-  
284 localization of the CK2 with another protein, such as the MoLah ortholog, or if CK2  
285 is in an aggregated form near septa. Since MoLah has the characteristics of an  
286 intrinsically disordered protein (Han et al., 2014), and CK2 interacts with some  
287 proteins to favour their disordered state, we favour the view that CK2 interacts with  
288 MoLah and other proteins to form a complex near septa.

289 Our pulldown experiment with GFP-CKa further showed that there was a strong  
290 overrepresentation of proteins interacting with CKa that contain known

291 phosphorylation motifs for unfolding of alpha-helices and this is what would be  
292 expected for intrinsically disordered proteins (Uversky, 2015; Zetina, 2001). The  
293 finding of overrepresentation of this signal in the set of CK2 interacting proteins  
294 corroborates the previous suggestion that CK2 is involved in the  
295 destabilization/binding of intrinsically disordered proteins (Zetina, 2001) and is  
296 consistent with the strong accumulation of both CK2 and intrinsically disordered  
297 proteins in the nucleolus (Fig. 4a and b) (Frege & Uversky, 2015) and also at pores  
298 between cell compartments (Lai et al., 2012) (Figure 4d). In addition, and further  
299 supporting this conclusion, the six septal pore associated proteins (SPA) that we find  
300 in the CKa pulldown are homologues for intrinsically disordered proteins that are  
301 expected to form temporary gels that are used to reversibly plug septal pores and  
302 regulate traffic through septa (Lai et al., 2012), CK2 could actively be involved in the  
303 gelling/un-gelling of the regions near septa to create a membraneless organelle  
304 controlling the flow through septa.

305 A close look at the subcytosolic localization reveals that this enzyme is also  
306 associated with cytosolic organelles protein import into organelles. CK2 promotes  
307 protein import into endoplasmic reticulum (Wang & Johnsson, 2005) and into  
308 mitochondria and mitochondrial biogenesis (Rao et al., 2011). CK2 phosphorylation  
309 has been shown to be needed to activate Tom 22 precursors to get a functional  
310 mitochondrial import machinery (Rao et al., 2011). Although CK2 has been  
311 implicated to be located in mitochondria in earlier works in other organisms no  
312 proteomic study of yeast mitochondria has detected a presence of CK2 (Rao et al.,  
313 2011) wherefore we do not expect MoCK2 to be present in mitochondria. Of special  
314 interest was consequently the strong overrepresentation of mitochondrial proteins  
315 among the CKa pulldown proteins without the alpha helix phosphorylation unfolding  
316 motif (Supplementary File 4). Since these proteins need to be imported into  
317 mitochondria in an unfolded unbound state this may point to the existence of other

318 CKa phosphorylation and unfolding motifs that help keep these proteins unfolded  
319 until they reach their destination inside the mitochondria.

320 To have such dynamic function as an unfold of proteins by phosphorylation, CK2  
321 should be partnered with phosphatases as counterparts and their activity may track  
322 CK2 activity. Consistent with this possibility, we found that two of the five S/T  
323 phosphatases that are present in the pulldown are transcriptionally strongly co-  
324 regulated with CKa (Figure 9), further supporting the view that CKa-dependent  
325 phosphorylation/dephosphorylation plays a major role in shaping protein interactions.  
326 Together with the high expression of CK2 in cells, this suggests an important  
327 function of CK2 as a general temporary unfold of intrinsically disordered proteins  
328 that comprise roughly 30 % of eukaryotic proteins (Vucetic, Brown, Dunker, &  
329 Obradovic, 2003).

330 As MoCK2 is present in the cytoplasm and nucleoplasm it could generally assist  
331 intrinsically disordered proteins forming larger protein complexes (Uversky, 2015). It  
332 also seems to be essential for assembling ribosomes containing large numbers of  
333 intrinsically disordered proteins (Uversky, 2015). All these functions also explains  
334 why CK2 is needed constitutively (Meggio & Pinna, 2003).

335 In the absence of well-functioning autophagy removing incorrectly formed larger  
336 protein aggregates, like those formed in brain cells of Alzheimer's patients (Zare-  
337 shahabadi, Masliah, Johnson, & Rezaei, 2015), CK2 activity facilitates protein  
338 aggregate formation and hastens the progression of Alzheimer's disease (Rosenberger  
339 et al., 2016). Using publicly available transcriptome datasets we could show that CKa  
340 expression in *M. oryzae* and *F. graminearum* is strongly correlated to Atg8  
341 expression (Figure 8), and thus autophagy, giving further support for a relationship of  
342 CK2 in facilitating the formation of protein aggregates from intrinsically unfolded  
343 proteins that are then subjected to autophagy. As autophagy is important to

344 appressorium development (X. Liu & Lin, 2008; Kershaw & Talbot, 2009), it will be  
345 of interest to further examine the role of the CK2 ring structure during appressorial  
346 development and infection. The CK2-HRS may be a true filament of CK2 in a  
347 relatively inactive state that may be a store for CK2 so that upon infection, it can  
348 facilitate rapid ribosome biogenesis, appressorial pore function, and other  
349 pathogenesis-specific functions.

## 350 Conclusion

351 We conclude that CK2 most likely has an important role in the correct  
352 assembly/disassembly of intrinsically disordered proteins as well as allowing these  
353 proteins to pass through narrow pores between cell compartments in addition to its  
354 already suggested role in organelle biogenesis (Rao et al., 2011). Our results further  
355 point to one of the main functions of the CK2 holoenzyme as a general facilitator of  
356 protein-protein interactions important for a large range of cellular processes including  
357 a potential role for gel formation that creates membraneless organelles at septa  
358 through its likely interaction with, and modification of, intrinsically disordered  
359 proteins. Most of our evidence for these functions of CK2 is, however, indirect and  
360 future experiments and methods development will be needed to directly demonstrate  
361 the suggested role for CK2 in relation to intrinsically disordered proteins.

362

## 363 Methods

### 364 Fungal strains, culture, and transformation

365 The *M. oryzae* Ku80 mutant (kindly provided by Professor Jin-Rong Xu Department  
366 of Botany and Plant Pathology Purdue University, U.S.A.) of the wild type Guy11  
367 strain was used as background strain since it lacks non-homologous end joining  
368 which facilitates gene targeting (Villalba et al., 2008). Ku80 and its derivative strains

369 (Table 1) were all stored on dry sterile filter paper and cultured on complete medium  
370 (CM: 0.6% yeast extract, 0.6% casein hydrolysate, 1% sucrose, 1.5% agar) or starch  
371 yeast medium (SYM: 0.2% yeast extract, 1% starch, 0.3% sucrose, 1.5% agar) at  
372 25°C. For conidia production, cultures were grown on rice bran medium (1.5% rice  
373 bran, 1.5% agar) with constant light at 25°C. Needed genome and proteome FASTA  
374 files was downloaded from an FTP-server at the Broad Institute  
375 ([ftp://ftp.broadinstitute.org/pub/annotation/fungi/magnaporthe/genomes/magnaporthe\\_oryzae\\_70-15\\_8/](ftp://ftp.broadinstitute.org/pub/annotation/fungi/magnaporthe/genomes/magnaporthe_oryzae_70-15_8/)). Fungal transformants were selected for the appropriate markers  
376 inserted by the plasmid vectors. The selective medium contained either 600 µg/ml of  
377 hygromycin B or 600 µg/ml of G418 or 50 µg/ml chlorimuron ethyl.  
378

379

### 380 **MoCKb gene replacement and complementation**

381 Gene replacement mutants of *MoCKb1* encoding protein MoCKb1 were generated by  
382 homologous recombination. Briefly, a fragment about 0.9 Kb just upstream of  
383 *Mockb1* ORF was amplified with the primers 446AF and 446AR (Table 2), so was  
384 the 0.7Kb fragment just downstream of *Mockb1* ORF amplified with the primers  
385 446BF and 446BR (Table 2). Both fragments were linked with the hygromycin  
386 phosphotransferase (*hph*) gene amplified from pCX62 (containing the fragment of  
387 TrpC promoter and hygromycin phosphotransferase (*hph*) gene, HPH resistance).  
388 Then the fusion fragments were transformed into protoplasts of the background strain  
389 Ku80. The positive transformant  $\Delta Mockb1$  was picked from a selective agar medium  
390 supplemented with 600 µg/ml of hygromycin B and verified by Southern blot.

391 For complementation of the mutant, fragments of the native promoter and gene  
392 coding region were amplified using the primers 446comF and 446comR listed Table  
393 2. This fragment was inserted into the pCB1532 to construct the complementation  
394 vector using the XbaI and KpnI. Then this vector was transformed into the

395 protoplasts of the  $\Delta Mockb1$  mutant. The positive complementation transformant  
396 MoCKb1C was picked up from the selective agar medium supplemented with  
397 50 $\mu$ g/ml chlorimuron ethyl.

398 As for the  $\Delta MoCKb1$  deletion mutant, we constructed a knockout vector to delete the  
399 *MoCKb2* from the background strain Ku80. All the primers are listed in the Table 2.  
400 The 1.0Kb fragment upstream of *MoCKb2* ORF was amplified with the primers  
401 5651AF and 5651AR, inserted into the plasmid pCX62 using the KpnI and EcoRI to  
402 get the pCX-5A vector. The 1.0Kb fragment downstream of *Mockb2* ORF was  
403 amplified with the primers 5651BR and 5651BR, inserted into the vector pCX-5A  
404 using BamHI and XbaI to construct the knockout vector pCX-5D. Then this vector  
405 was transformed into the protoplasts of Ku80. The positive transformants were  
406 picked up from the selective medium supplemented with the 600  $\mu$ g/ml hygromycin  
407 B. For complementation of the mutant, fragments of the native promoter and gene  
408 coding region were amplified using the primers 5651comF and 5651comR listed in  
409 the Table 2. This fragment was inserted into pCB1532 to construct the  
410 complementation vector using the XbaI and XmaI. Then this vector was transformed  
411 into protoplasts of the  $\Delta Mockb2$  mutant. The positive complementation transformant  
412 MoCKb2C was picked up from the selective agar medium supplemented with 50  
413  $\mu$ g/ml chlorimuron ethyl.

#### 414 **The construction of localization vectors**

415 In order to detect the localization of MoCK2, we constructed localization vectors.  
416 The vector pCB-3696OE containing the RP27 strong promoter was used to detect the  
417 localization of GFP-MoCKa. The vector pCB-446OE expressed under RP27 strong  
418 promoter was used to detect the localization of GFP-MoCKb1. The vector pCB-  
419 5651OE expressed by RP27 strong promoter was used to detect the localization of  
420 GFP-MoCKb2.



## 421 **Analysis of conidial morphology, conidial germination and appressoria formation**

422 Conidia were prepared from cultures grown on 4% rice bran medium. Rice bran  
423 medium was prepared by boiling 40g rice bran (can be bought for example through  
424 Alibaba.com) in 1L DD-water for 30 minutes. After cooling pH was adjusted from to  
425 6.5 using NaOH and 20 g agar (MDL No MFCD00081288) was added before  
426 sterilization by autoclaving (121 °C for 20 minutes). Conidia morphology was  
427 observed using confocal microscopy (Nikon A1<sup>+</sup>). The Conidial germination and  
428 appressoria formation were incubated on hydrophobic microscope cover glass  
429 (Beckerman & Ebbole, 1996) (Fisherbrand) under 25°C in the dark. Conidial  
430 germination and appressoria formation were examined at 24 h post-incubation  
431 (Beckerman & Ebbole, 1996; Ding et al., 2010).

## 432 **Pathogenicity assay**

433 Plant infection assays were performed on rice leaves. The rice cultivar used for  
434 infection assays was CO39. In short, mycelial plugs were put on detached intact  
435 leaves or leaves wounded by a syringe stabbing. These leaves were incubated in the  
436 dark for 24h and transferred into constant light and incubated for 5 days to assess  
437 pathogenicity (Talbot et al., 1996). For infections using conidial suspensions ( $1 \times 10^5$   
438 conidia/ml in sterile water with 0.02% Tween 20) were sprayed on the rice leaves of  
439 2-week-old seedlings.

## 440 **RNA extraction and real-time PCR analysis**

441 RNA was extracted with the RNAiso Plus kit (TaKaRa). First strand cDNA was  
442 synthesized with the PrimeScript RT reagent Kit with gDNA Eraser (TaKaRa). For  
443 quantitative real-time PCR, *MoCKa*, *MoCKb1*, and *MoCKb2* were amplified with the  
444 primers listed in Table 2.  $\beta$ -tubulin (XP\_368640) was amplified as an endogenous  
445 control. Real-time PCR was performed with the TaKaRa SYBR Premix Ex Taq

446 (Perfect Real Time) (Takara). The relative expression levels were calculated using  
447 the  $2^{-\Delta\Delta C_t}$  method (Livak & Schmittgen, 2001).

#### 448 **Pulldown and identification of CKa interacting proteins**

449 Total protein samples were extracted from vegetative mycelia of strain GFP-MoCKa  
450 and incubated with anti-GFP beads (Chromotek, Hauppauge, NY, USA) 90 minutes  
451 at 4°C with gentle shaking. After a series of washing steps, proteins bound to anti-  
452 GFP beads were eluted following the manufacturer's instruction. The eluted proteins  
453 were sent to BGI Tech (Shenzhen, Guangdong province, China) and analysed by  
454 mass spectrometry for analysis of sequence hits against the *M. oryzae* proteome. The  
455 transformant expressing GFP protein only was used as the negative control and the  
456 Ku80 was used as Blank control. Data from three biological replicates were analyzed  
457 against the background of proteins that were bound non-specifically to the anti-GFP  
458 beads in GFP transformant and in WT to get the final gene list of genes that was  
459 pulldown with CKa (Supplementary File1).

#### 460 **Estimation of non-specific binding of proteins in the pulldown**

461 We developed two methods to estimate the number of non-specific binding proteins  
462 found in the CKa pulldown. The first approach is a chemistry-based reasoning and  
463 assumes that the degree of unspecific association to the protein per protein surface  
464 area is the same for GFP specific hits and for the CK2 holoenzyme pulled down.  
465 Using this technique, we estimate that 44-132 proteins are false positive in the CKa  
466 pulldown (all proteins pulled down by GFP-Beads or the Beads already removed  
467 from the list) (Supplementary File 1). The Second approach is statistical where we  
468 assume that binding of the true interacting proteins to CKa are log-normally  
469 distributed related to the abundance of each protein in the pulldown, since the median  
470 is low and close to zero and negative amounts are impossible. Using the deviation  
471 from the theoretical distribution, with higher than expected amounts of a specific

472 protein, for the less abundant proteins we estimate that 46-81 proteins found in the  
473 CKa pulldown (with controls subtracted) were false positive. The higher number was  
474 used to set a conservative threshold for which proteins should be included in the  
475 analysis (See Supplementary file S1 for details of both methods).

#### 476 **Finding *M. oryzae* proteins containing the helix unfolding motif**

477 The MEME motif LSDDDXE/SLEEEEXD (Zetina, 2001) was used to search through  
478 the proteome of *M. oryzae* using the FIMO tool at the MEMESuite website  
479 (<http://meme-suite.org/>). Results were then downloaded and handled in MS Excel to  
480 produce a list of proteins with at least one motif hit (Supplementary File 2)

#### 481 **Analysis of CKa expression in relation to Atg8 expression**

482 For *M. oryzae* transcriptome experiment data was downloaded as sra/fastq files from  
483 <https://www.ncbi.nlm.nih.gov/geo/> and mapped onto the genome found at  
484 [http://fungi.ensembl.org/Magnaporthe\\_oryzae/Info/Index](http://fungi.ensembl.org/Magnaporthe_oryzae/Info/Index). For *Fusarium*  
485 *graminearum* transcriptomic data was downloaded as FusariumPLEX data for in  
486 planta experiments from the PlexDB database (<http://www.plexdb.org>). For each  
487 fungus an expression matrix with the different experiments as columns and gene id as  
488 rows were prepared. These matrixes we use as general resources for testing  
489 correlation of expression between sets of genes. From these matrixes we used the  
490 data needed to plot expression of Atg8 vs CKa for the two fungi. Gene expression  
491 data used were from the here identified MoCKa, MoAtg8 (MGG\_1062) (Veneault-  
492 Fourrey, 2006), FgCKa (FGSG\_00677) (C. Wang et al., 2011) and FgAtg8  
493 (FGSG\_10740) (Josefsen et al., 2012) genes, respectively. Data from the *M. oryzae*  
494 expression matrix was also used for plotting MoCKa expression versus the  
495 expression of serine/threonine phosphatases found in the CKa pulldown.

#### 496 **Data availability**

497 The data that support the findings of this study are available from the corresponding  
498 authors upon reasonable request.

499

## 500 **References**

- 501 Ahmad, K. A., Wang, G., Unger, G., Slaton, J., & Ahmed, K. (2008). Protein kinase CK2 – A key  
502 suppressor of apoptosis. *Advances in Enzyme Regulation*, *48*(1), 179–187.  
503 <https://doi.org/10.1016/j.advenzreg.2008.04.002>
- 504 Ariazi, J., Benowitz, A., De Biasi, V., Den Boer, M. L., Cherqui, S., Cui, H., ... Zurzolo, C. (2017).  
505 Tunneling Nanotubes and Gap Junctions–Their Role in Long-Range Intercellular  
506 Communication during Development, Health, and Disease Conditions. *Frontiers in*  
507 *Molecular Neuroscience*, *10*. <https://doi.org/10.3389/fnmol.2017.00333>
- 508 Beckerman, J. L., & Ebbole, D. J. (1996). MPG1, a Gene Encoding a Fungal Hydrophobin of  
509 Magnaporthe grisea, Is Involved in Surface Recognition. *MPMI*, *9*(6), 450–456.
- 510 Cavinder, B., Sikhakolli, U., Fellows, K. M., & Trail, F. (2012). Sexual Development and  
511 Ascospore Discharge in Fusarium graminearum. *Journal of Visualized Experiments*, (61).  
512 <https://doi.org/10.3791/3895>
- 513 Dagdas, Y. F., Yoshino, K., Dagdas, G., Ryder, L. S., Bielska, E., Steinberg, G., & Talbot, N. J.  
514 (2012). Septin-mediated plant cell invasion by the rice blast fungus, Magnaporthe oryzae.  
515 *Science*, *336*, 1590–1594.
- 516 Dean, R., Van Kan, J. A. L., Pretorius, Z. A., Hammond-Kosack, K. E., Di Pietro, A., Spanu, P.  
517 D., ... Foster, G. D. (2012). The Top 10 fungal pathogens in molecular plant pathology: Top  
518 10 fungal pathogens. *Molecular Plant Pathology*, *13*(4), 414–430.  
519 <https://doi.org/10.1111/j.1364-3703.2011.00783.x>

- 520 Ding, S.-L., Liu, W., Iliuk, A., Ribot, C., Vallet, J., Tao, A., ... Xu, J.-R. (2010). The Tig1 Histone  
521 Deacetylase Complex Regulates Infectious Growth in the Rice Blast Fungus *Magnaporthe*  
522 *oryzae*. *THE PLANT CELL ONLINE*, 22(7), 2495–2508.  
523 <https://doi.org/10.1105/tpc.110.074302>
- 524 Ebbole, D. J. (2007). *Magnaporthe* as a Model for Understanding Host-Pathogen Interactions.  
525 *Annual Review of Phytopathology*, 45(1), 437–456.
- 526 Filhol, O., Nueda, A., Martel, V., Gerber-Scokaert, D., Benitez, M. J., Souchier, C., ... Cochet, C.  
527 (2003). Live-Cell Fluorescence Imaging Reveals the Dynamics of Protein Kinase CK2  
528 Individual Subunits. *Molecular and Cellular Biology*, 23(3), 975–987.  
529 <https://doi.org/10.1128/MCB.23.3.975-987.2003>
- 530 Frege, T., & Uversky, V. N. (2015). Intrinsically disordered proteins in the nucleus of human cells.  
531 *Biochemistry and Biophysics Reports*, 1, 33–51. <https://doi.org/10.1016/j.bbrep.2015.03.003>
- 532 Glover, C. V. (1986). A Filamentous Form of *Drosophila* Casein Kinase II. *The Journal of*  
533 *Biological Chemistry*, 261(30), 14349–14354.
- 534 Götz, C., & Montenarh, M. (2016). Protein kinase CK2 in development and differentiation  
535 (Review). *Biomedical Reports*. <https://doi.org/10.3892/br.2016.829>
- 536 Han, P., Jin, F. J., Maruyama, J., & Kitamoto, K. (2014). A Large Nonconserved Region of the  
537 Tethering Protein Leashin Is Involved in Regulating the Position, Movement, and Function  
538 of Woronin Bodies in *Aspergillus oryzae*. *Eukaryotic Cell*, 13(7), 866–877.  
539 <https://doi.org/10.1128/EC.00060-14>
- 540 Hübner, G. M., Larsen, J. N., Guerra, B., Niefind, K., Vrecl, M., & Issinger, O.-G. (2014). Evidence  
541 for aggregation of protein kinase CK2 in the cell: a novel strategy for studying CK2  
542 holoenzyme interaction by BRET2. *Molecular and Cellular Biochemistry*, 397(1–2), 285–  
543 293. <https://doi.org/10.1007/s11010-014-2196-y>

- 544 Josefsen, L., Droce, A., Sondergaard, T. E., Sørensen, J. L., Bormann, J., Schäfer, W., ... Olsson, S.  
545 (2012). Autophagy provides nutrients for nonassimilating fungal structures and is necessary  
546 for plant colonization but not for infection in the necrotrophic plant pathogen *Fusarium*  
547 *graminearum*, 8(3), 13.
- 548 Kershaw, M. J., & Talbot, N. J. (2009). Genome-wide functional analysis reveals that infection-  
549 associated fungal autophagy is necessary for rice blast disease. *Proceedings of the National*  
550 *Academy of Sciences*, 106(37), 15967–15972. <https://doi.org/10.1073/pnas.0901477106>
- 551 Klionsky, D. J., Abdelmohsen, K., Abe, A., Abedin, M. J., Abeliovich, H., Acevedo Arozena,  
552 A., ... Zughayer, S. M. (2016). Guidelines for the use and interpretation of assays for  
553 monitoring autophagy (3rd edition). *Autophagy*, 12(1), 1–222.  
554 <https://doi.org/10.1080/15548627.2015.1100356>
- 555 Kragler, F. (2013). Plasmodesmata: intercellular tunnels facilitating transport of macromolecules in  
556 plants. *Cell and Tissue Research*, 352(1), 49–58. <https://doi.org/10.1007/s00441-012-1550-1>
- 557 Lai, J., Koh, C. H., Tjota, M., Pieuchot, L., Raman, V., Chandrababu, K. B., ... Jedd, G. (2012).  
558 Intrinsically disordered proteins aggregate at fungal cell-to-cell channels and regulate  
559 intercellular connectivity. *Proceedings of the National Academy of Sciences*, 109(39),  
560 15781–15786. <https://doi.org/10.1073/pnas.1207467109>
- 561 Litchfield, D. W. (2003). Protein kinase CK2: structure, regulation and role in cellular decisions of  
562 life and death. *Biochemical Journal*, 369(1), 1–15.
- 563 Liu, W., Xie, S., Zhao, X., Chen, X., Zheng, W., Lu, G., ... Wang, Z. (2010). A homeobox gene is  
564 essential for conidiogenesis of the rice blast fungus *Magnaporthe oryzae*. *Molecular Plant-*  
565 *Microbe Interactions*, 23(4), 366–375.

- 566 Liu, X., & Lin, F. (2008). Investigation of the biological roles of autophagy in appressorium  
567 morphogenesis in *Magnaporthe oryzae*. *Journal of Zhejiang University SCIENCE B*, 9(10),  
568 793–796. <https://doi.org/10.1631/jzus.B0860013>
- 569 Livak, K. J., & Schmittgen, T. D. (2001). Analysis of Relative Gene Expression Data Using Real-  
570 Time Quantitative PCR and the  $2^{-\Delta\Delta CT}$  Method. *Methods*, 25(4), 402–408.  
571 <https://doi.org/10.1006/meth.2001.1262>
- 572 Meggio, F., & Pinna, L. A. (2003). One thousand-and one substrates of protein kinase CK2. *The*  
573 *FASEB Journal*, 17, 349–368.
- 574 Mehra, A., Shi, M., Baker, C. L., Colot, H. V., Loros, J. J., & Dunlap, J. C. (2009). A Role for  
575 Casein Kinase 2 in the Mechanism Underlying Circadian Temperature Compensation. *Cell*,  
576 137(4), 749–760. <https://doi.org/10.1016/j.cell.2009.03.019>
- 577 Neijssen, J., Herberts, C., Drijfhout, J. W., Reits, E., Janssen, L., & Neeffjes, J. (2005). Cross-  
578 presentation by intercellular peptide transfer through gap junctions. *Nature*, 434, 83–88.
- 579 Ng, S. K., Liu, F., Lai, J., Low, W., & Jedd, G. (2009). A Tether for Woronin Body Inheritance Is  
580 Associated with Evolutionary Variation in Organelle Positioning. *PLoS Genetics*, 5(6),  
581 e1000521. <https://doi.org/10.1371/journal.pgen.1000521>
- 582 Padmanabha, R., Chen-Wu, J. L.-P., Arnot, D. E., & Glover, C. V. C. (1990). Isolation, sequencing,  
583 and disruption of the yeast CKA2 gene casein kinase II is essential for viability in  
584 *Saccharomyces cerevisiae*. *Molecular And Cellular Biology*, 10(8), 4089–4099.
- 585 Plamann, M. (2009). Cytoplasmic Streaming in *Neurospora*: Disperse the Plug To Increase the  
586 Flow? *PLoS Genetics*, 5(6), e1000526. <https://doi.org/10.1371/journal.pgen.1000526>
- 587 Poole, A., Poore, T., Bandhakavi, S., McCann, R. O., Hanna, D. E., & Glover, C. V. (2005). A  
588 global view of CK2 function and regulation. *Molecular and Cellular Biochemistry*, 274(1–  
589 2), 163–170.

- 590 Rao, S., Gerbeth, C., Harbauer, A., Mikropoulou, D., Meisinger, C., & Schmidt, O. (2011).  
591 Signaling at the gate: Phosphorylation of the mitochondrial protein import machinery. *Cell*  
592 *Cycle*, *10*(13), 2083–2090. <https://doi.org/10.4161/cc.10.13.16054>
- 593 Rosenberger, A. F. N., Morrema, T. H. J., Gerritsen, W. H., van Haastert, E. S., Snkhchyan, H.,  
594 Hilhorst, R., ... Hoozemans, J. J. M. (2016). Increased occurrence of protein kinase CK2 in  
595 astrocytes in Alzheimer's disease pathology. *Journal of Neuroinflammation*, *13*(1).  
596 <https://doi.org/10.1186/s12974-015-0470-x>
- 597 Seetoh, W.-G., Chan, D. S.-H., Matak-Vinković, D., & Abell, C. (2016). Mass Spectrometry  
598 Reveals Protein Kinase CK2 High-Order Oligomerization *via* the Circular and Linear  
599 Assembly. *ACS Chemical Biology*, *11*(6), 1511–1517.  
600 <https://doi.org/10.1021/acscchembio.6b00064>
- 601 Shen K-F., Osmani A. S., Govindaraghavan M., & Osmani S. A. (2014). Mitotic rregulation of  
602 fungal cell-to-cell connectivity through septal pores involves the NIMA kinase. *Molecular*  
603 *Biology of the Cell*, *25*, 763–775. <https://doi.org/10.1091/mbc.E13-12-0718>
- 604 Shlezinger, N., Goldfinger, N., & Sharon, A. (2012). Apoptotic-like prograded cell death in fungi:  
605 the benefits in filamentous species. *Frontiers in Oncology*, *2*.  
606 <https://doi.org/10.3389/fonc.2012.00097>
- 607 Talbot, N. J., Kershaw, M. J., Wakley, G. E., De Vries, O. M., Wessels, J. G., & Hamer, J. E.  
608 (1996). MPG1 encodes a fungal hydrophobin involved in surface interactions during  
609 infection-related development of *Magnaporthe grisea*. *The Plant Cell Online*, *8*(6), 985–999.
- 610 Uversky, V. N. (2015). The multifaceted roles of intrinsic disorder in protein complexes. *FEBS*  
611 *Letters*, *589*(19PartA), 2498–2506. <https://doi.org/10.1016/j.febslet.2015.06.004>
- 612 Valero, E., De Bonis, S., Filhol, O., Wade, R. H., Langowski, J., Chambaz, E. M., & Cochet, C.  
613 (1995). Quaternary Structure of Casein Kinase 2 - Characterization of Multiple Oligomeric



- 614 States and Relation with its Catalytic Activity. *The Journal of Biological Chemistry*,  
615 270(14), 8345–8352.
- 616 Veneault-Fourrey, C. (2006). Autophagic Fungal Cell Death Is Necessary for Infection by the Rice  
617 Blast Fungus. *Science*, 312(5773), 580–583. <https://doi.org/10.1126/science.1124550>
- 618 Villalba, F., Collemare, J., Landraud, P., Lambou, K., Brozek, V., Cirer, B., ... Lebrun, M.-H.  
619 (2008). Improved gene targeting in *Magnaporthe grisea* by inactivation of MgKU80  
620 required for non-homologous end joining. *Fungal Genetics and Biology*, 45(1), 68–75.  
621 <https://doi.org/10.1016/j.fgb.2007.06.006>
- 622 Vucetic, S., Brown, C. J., Dunker, A. K., & Obradovic, Z. (2003). Flavors of protein disorder.  
623 *Proteins: Structure, Function, and Bioinformatics*, 52(4), 573–584.
- 624 Wang, C., Zhang, S., Hou, R., Zhao, Z., Zheng, Q., Xu, Q., ... Xu, J.-R. (2011). Functional  
625 Analysis of the Kinome of the Wheat Scab Fungus *Fusarium graminearum*. *PLoS Pathogens*,  
626 7(12), e1002460. <https://doi.org/10.1371/journal.ppat.1002460>
- 627 Wang, X., & Johnsson, N. (2005). Protein kinase CK2 phosphorylates Sec63p to stimulate the  
628 assembly of the endoplasmic reticulum protein translocation apparatus. *Journal of Cell*  
629 *Science*, 118(4), 723–732. <https://doi.org/10.1242/jcs.01671>
- 630 Wong, E., & Cuervo, A. M. (2010). Integration of Clearance Mechanisms: The Proteasome and  
631 Autophagy. *Cold Spring Harbor Perspectives in Biology*, 2(12), a006734–a006734.  
632 <https://doi.org/10.1101/cshperspect.a006734>
- 633 Wright, P. E., & Dyson, H. J. (2015). Intrinsically disordered proteins in cellular signalling and  
634 regulation. *Nature Reviews Molecular Cell Biology*, 16(1), 18–29.  
635 <https://doi.org/10.1038/nrm3920>

636 Zare-shahabadi, A., Masliah, E., Johnson, G. V. W., & Rezaei, N. (2015). Autophagy in  
637 Alzheimer's disease. *Reviews in the Neurosciences*, 26(4). [https://doi.org/10.1515/revneuro-](https://doi.org/10.1515/revneuro-2014-0076)  
638 2014-0076

639 Zetina, C. R. (2001). A Conserved Helix-Unfolding Motif in the Naturally Unfolded Proteins.  
640 *Proteins: Structure, Functions, and Genetics*, 44, 479–483.

641

642 **Acknowledgements** We thank Dr. Guanghui Wang, Dr. Wenhui Zheng, Dr. Ya Li and  
643 Dr. Huawei Zheng (Fujian Agriculture and Forestry University, Fuzhou, China) for  
644 their helpful discussions. We thank Professor Jin-Rong Xu, Department of Botany  
645 and Plant Pathology Purdue University, U.S.A. for providing the Ku80 strain. We  
646 thank Dr. Bjoern Oest Hansen, Goettingen for help with mapping and constructing  
647 the used *M. oryzae* transcriptome datafile from downloaded data. This work was  
648 supported by the National Natural Science Foundation of China (U1305211),  
649 National Key Research and Development Program of China (2016YFD0300700) and  
650 National Natural Science Foundation for Young Scientists of China (Grant  
651 No.31500118 and No.31301630).

652 **Authors' contributions** Conceived and designed the experiments: G. L., S. O. and Z.  
653 W. Performed the experiments: L. Z., D. Z., Y. C., W. Y. and Q. L. Analysed the data:  
654 L. Z., D. Z., S. O. and Z. W. Wrote the paper: L. Z., D. Z., S. O. and Z. W.

655 **Competing interests statement** The authors declare that they have no competing  
656 financial interests.

657 **Correspondence** and request for materials should be addressed to S.O.  
658 ([stefan@olssonstefan.com](mailto:stefan@olssonstefan.com)) or Z.W. ([wangzh@fafu.edu.cn](mailto:wangzh@fafu.edu.cn)).

659

660

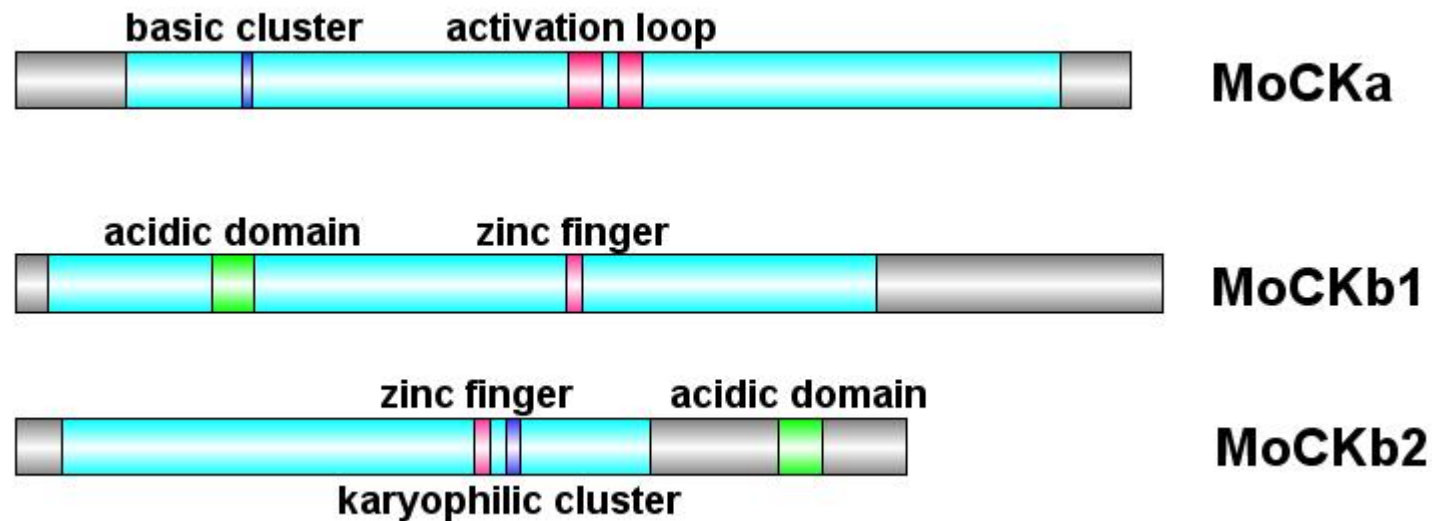

**Figure 1. Domain structure of the identified CK2 proteins.**

MoCKa sequence (341 aa) was obtained from NCBI and the 35-320 region contains the protein kinase domain ([https://www.ncbi.nlm.nih.gov/nuccore/XM\\_003716137.1](https://www.ncbi.nlm.nih.gov/nuccore/XM_003716137.1)) is labelled light blue, 70-73 is the basic cluster labelled dark blue and functions as a nuclear localization signal (NLS), 170-180 and 185-192 are activation loops (A-loop) labelled red.

MoCKb1 sequence (351 aa) was obtained from NCBI and the 11-264 region contains the Casein kinase II regulatory domain ([https://www.ncbi.nlm.nih.gov/protein/XP\\_003718622.1](https://www.ncbi.nlm.nih.gov/protein/XP_003718622.1)) labelled light blue, 61-74 is the acidic domain labelled green, 169-174 is the zinc finger domain labelled pink.

MoCKb2 sequence (273 aa) was obtained from NCBI and the 15-195 region is the Casein kinase II regulatory subunit domain ([https://www.ncbi.nlm.nih.gov/protein/XP\\_003710544.1](https://www.ncbi.nlm.nih.gov/protein/XP_003710544.1)) labelled light blue, 141-146 is a zinc finger labelled pink, 151-155 is a karyophilic cluster labelled dark blue that functions as a NLS, 234-247 is an acidic domain labelled green. The illustration was made using the DOG 2.0 Visualization of Protein Domain Structures <http://dog.biocuckoo.org/>.

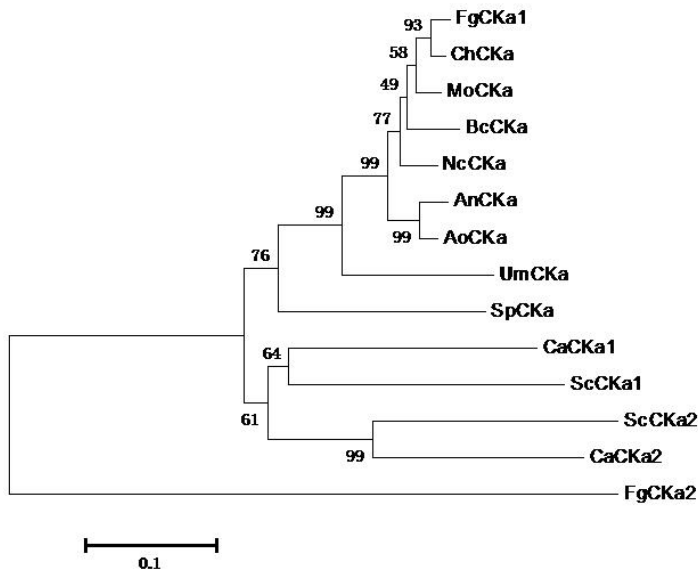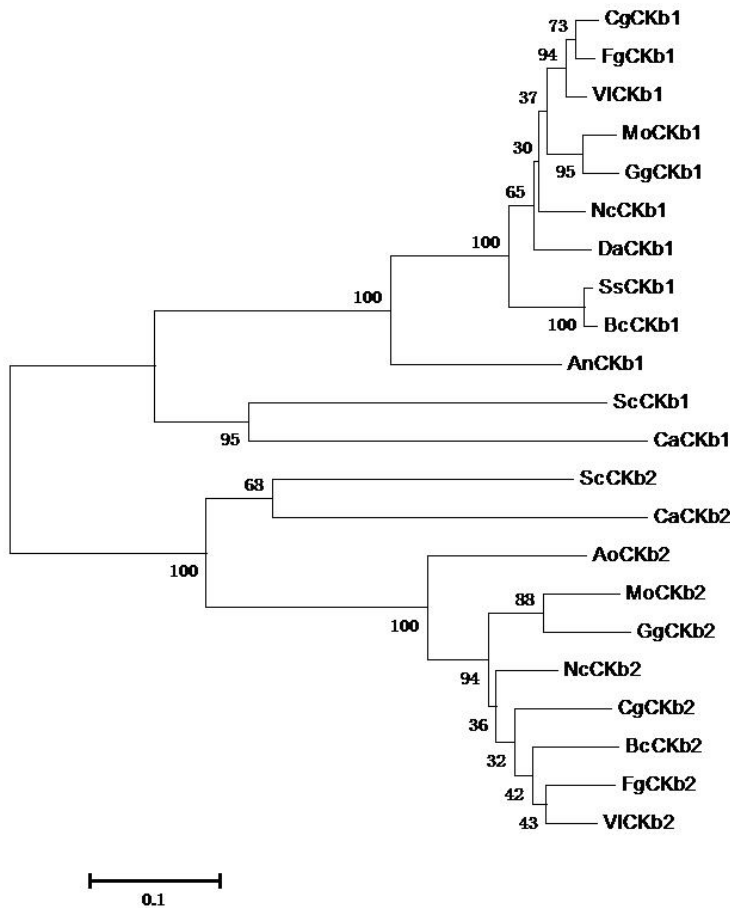

Figure 1 Supplement 1 (a) Phylogenetic analysis of CKa amino acid sequences from a range of organisms. A neighbor-joining tree was constructed from amino acid sequences of a range of CKa-encoding genes from diverse fungi. Tree topology was tested by 1000 bootstrap resampling of the data. Full species names and access codes for the annotated genes are given in Figure 1 Supplement 2 legend. (b) Phylogenetic analysis of CKb amino acid sequences from a range of organisms. A neighbor-joining tree was constructed from amino acid sequences of a range of CKb-encoding genes from diverse fungi. Tree topology was tested by 1000 bootstrap resampling of the data. Full species names and access codes for the annotated genes are given in Figure 1 Supplement 3 and Figure 1 Supplement 4 legends.

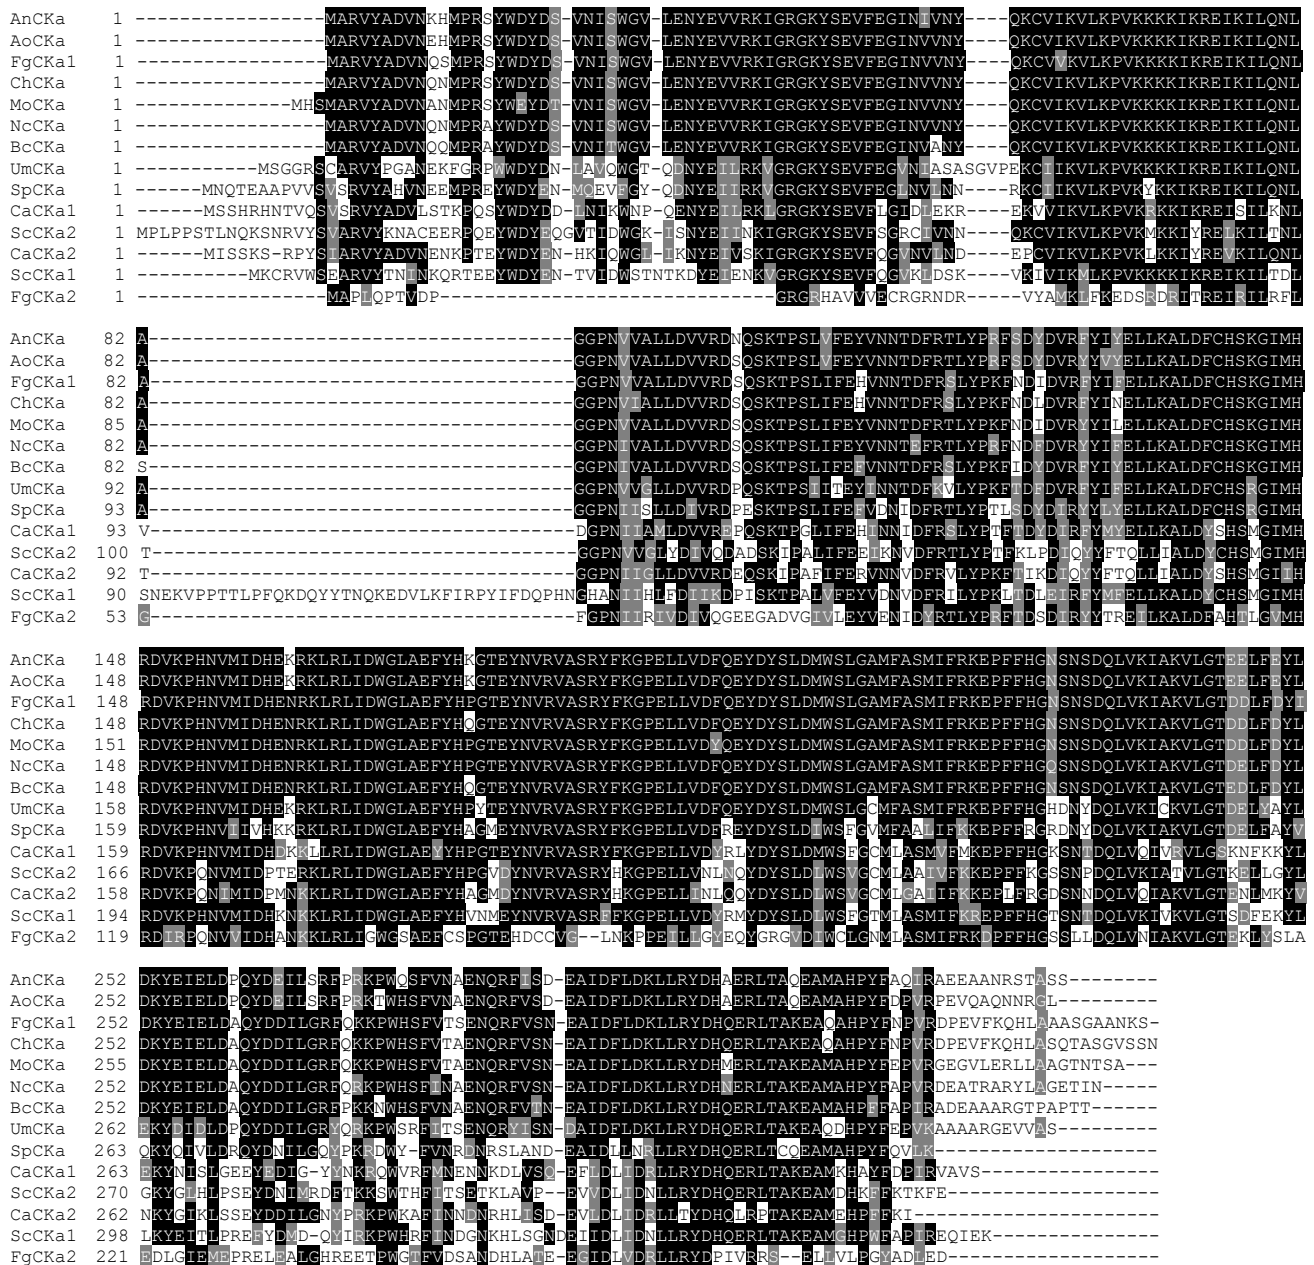

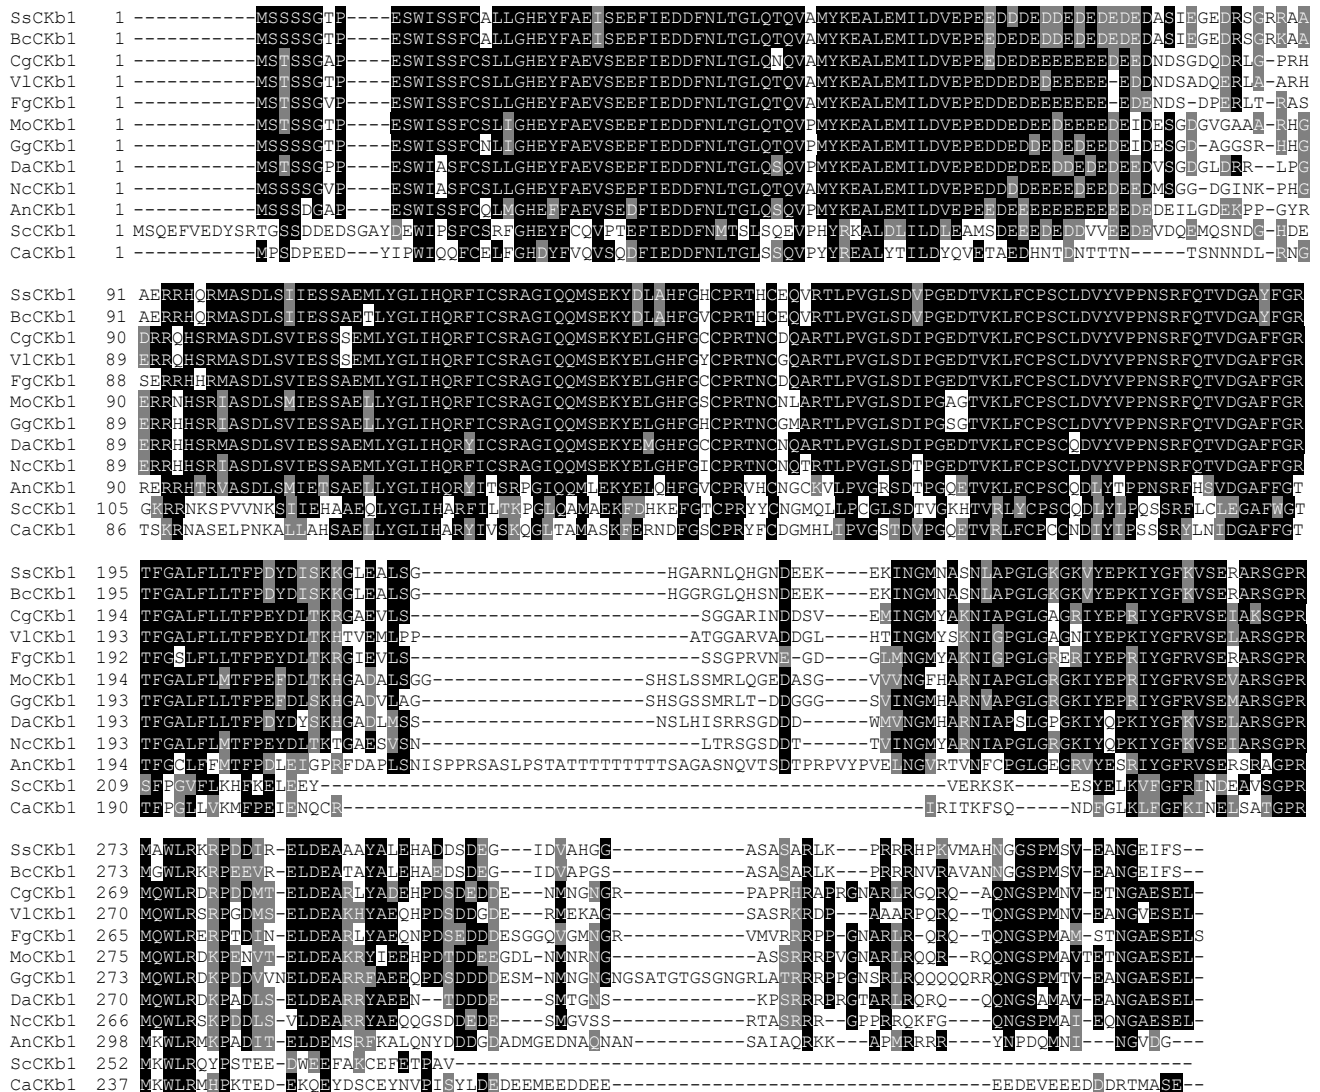

Figure 1 Supplement 3. Alignment of predicted amino acid sequences of CKb1 from different fungi. Sequence for the CKb1 in *M. oryzae* and other fungi were aligned using ClustalW and shaded by Boxshade 3.2. Identical amino acids are highlighted on a black background and similar amino acids on a light grey background. The *M. oryzae* amino acid sequence is aligned with the sequences of the putative homologs:

- MoCKb1 (*M. oryzae*, XP\_003718622.1),
- GgCKb1 (*Gaeumannomyces graminis*, XP\_009229023.1)
- CgCKb1 (*Colletotrichum graminicola*, XP\_008099475.1),
- NcCKb1 (*N. crassa*, XP\_960447.1),
- FgCKb1 (*F. graminearum*, XP\_011320142.1),
- SsCKb1 (*Sclerotinia sclerotiorum*, XP\_001592667.1),
- BcCKb1 (*B. cinerea*, XP\_001546938.1),
- DaCKb1 (*Diaporthe ampelina*, KKY35702.1),
- VlCKb1 (*Verticillium longisporum*, CRK29524.1),
- AnCKb1 (*A. nidulans*, CBF77758.1),
- ScCKb1 (*S. cerevisiae*, NP\_011496.3),
- CaCKb1 (*C. albicans*, KHC46950.1).

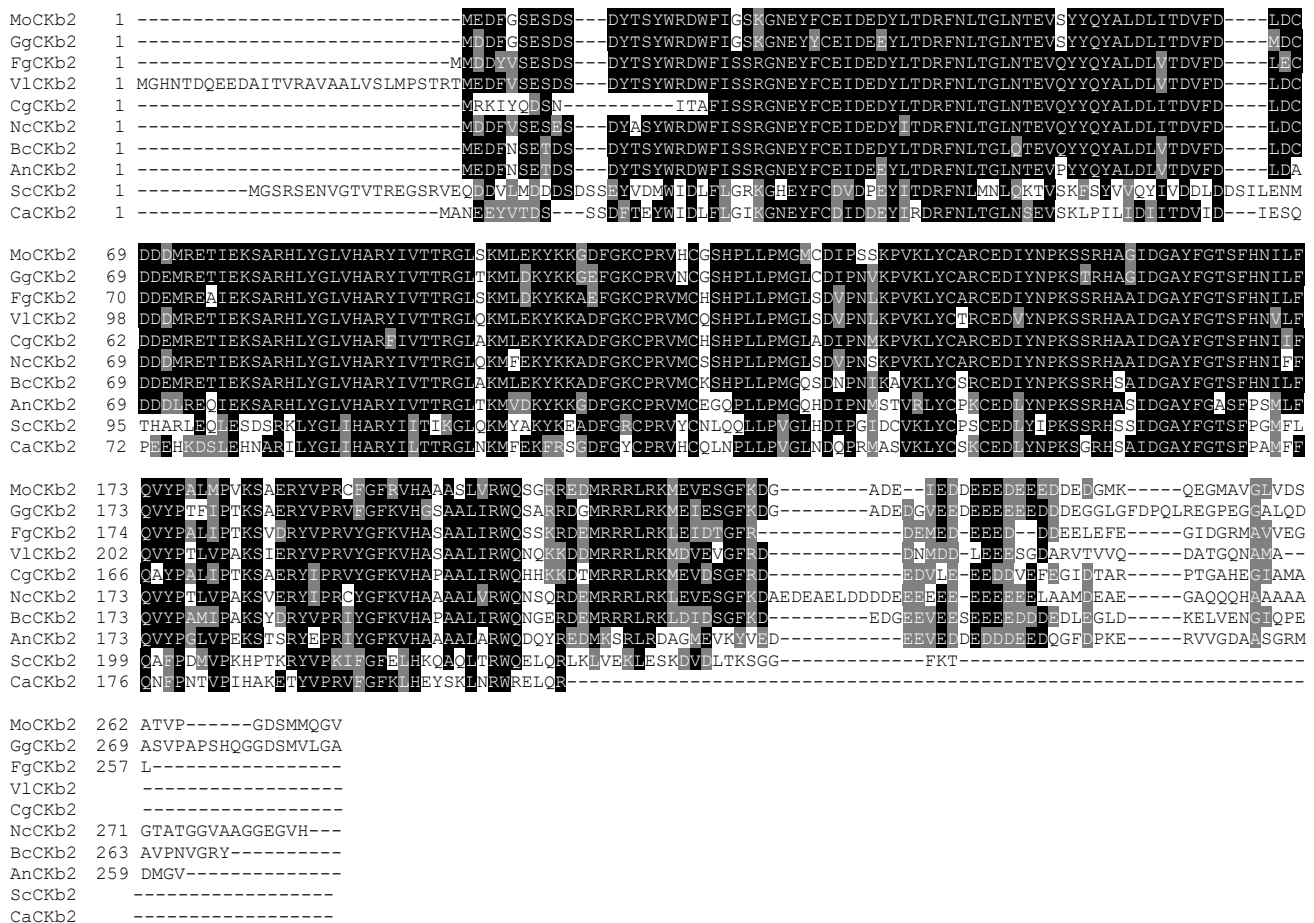

Figure 1 Supplment 4. Alignment of predicted amino acid sequences of CKb2 from different fungi. Sequence for the CKb2 in *M. oryzae* and other fungi were aligned using ClustalW and shaded by Boxshade 3.2. Identical amino acids are highlighted on a black background and similar amino acids on a light grey background. The *M. oryzae* amino acid sequence is aligned with the sequences of the putative homologs:

- |                                                   |                                                |
|---------------------------------------------------|------------------------------------------------|
| MoCKb2 ( <i>M. oryzae</i> , XP_003710544.1),      | NcCKb2 ( <i>N. crassa</i> , XP_001728406.1),   |
| GgCKb2 ( <i>G. graminis</i> , XP_009217338.1),    | BcCKb2 ( <i>B. cinerea</i> , XP_001558441.1),  |
| FgCKb2 ( <i>F. graminearum</i> , EYB21652.1),     | AnCKb2 ( <i>A. nidulans</i> , XP_001825358.2), |
| VlCKb2 ( <i>V. longisporum</i> , CRK18911.1),     | ScCKb2 ( <i>S. cerevisiae</i> , AAT93000.1),   |
| CgCKb2 ( <i>C. graminicola</i> , XP_008092732.1), | CaCKb2 ( <i>C. albicans</i> , EEQ46313.1).     |

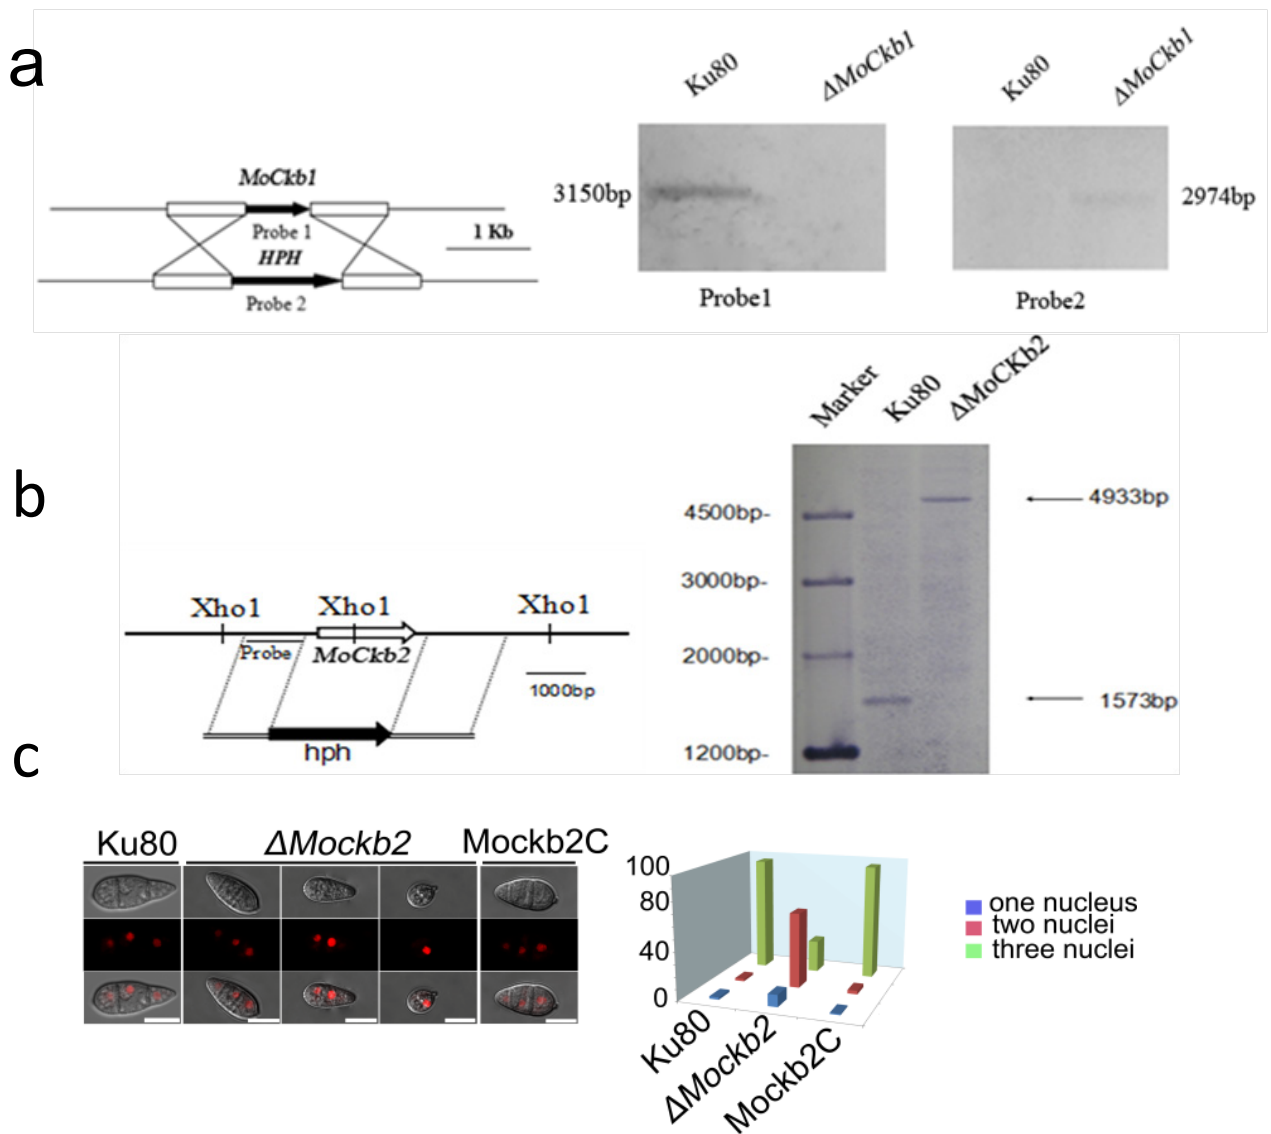

**Figure 2. Knockout of the MoCKBs and the effect of this on conidia morphology and MoCKa gene expression** (a)  $\Delta MoCkb1$  mutant was verified by Southern blot analysis. The genomic DNA extracted from the strains Ku80 and the mutant  $\Delta MoCkb1$  was digested with *Nde1* and tested by Southern blot. The different probes ORF and hph were amplified from the genomic DNA of the wild type Ku80 and the plasmid pCX62 respectively. (b)  $\Delta MoCkb2$  mutant was verified by Southern blot analysis. The genomic DNA extracted from the strains Ku80 and the mutant  $\Delta MoCkb2$  was digested with *Xho1* and tested by Southern blot. The probe was amplified from the genomic DNA of the background strain Ku80. (c) The conidial morphology of the  $\Delta Mockb2$  deletion was detected. The red fluorescence show the nuclear number in the conidia. The red fluorescence was due to the nuclear protein histone linker (MGG\_12797) fused with mCherry used as nuclear marker. All bars = 10  $\mu$ m. The percentage of conidia with different nuclear number in the conidia produced by the background strain Ku80, the  $\Delta Mockb2$  deletion mutant and in the complementation strain MoCKb2C.



Ku80  
GFP-MoCKa  
GFP-MoCKb1  
GFP-MoCKb2  
CK

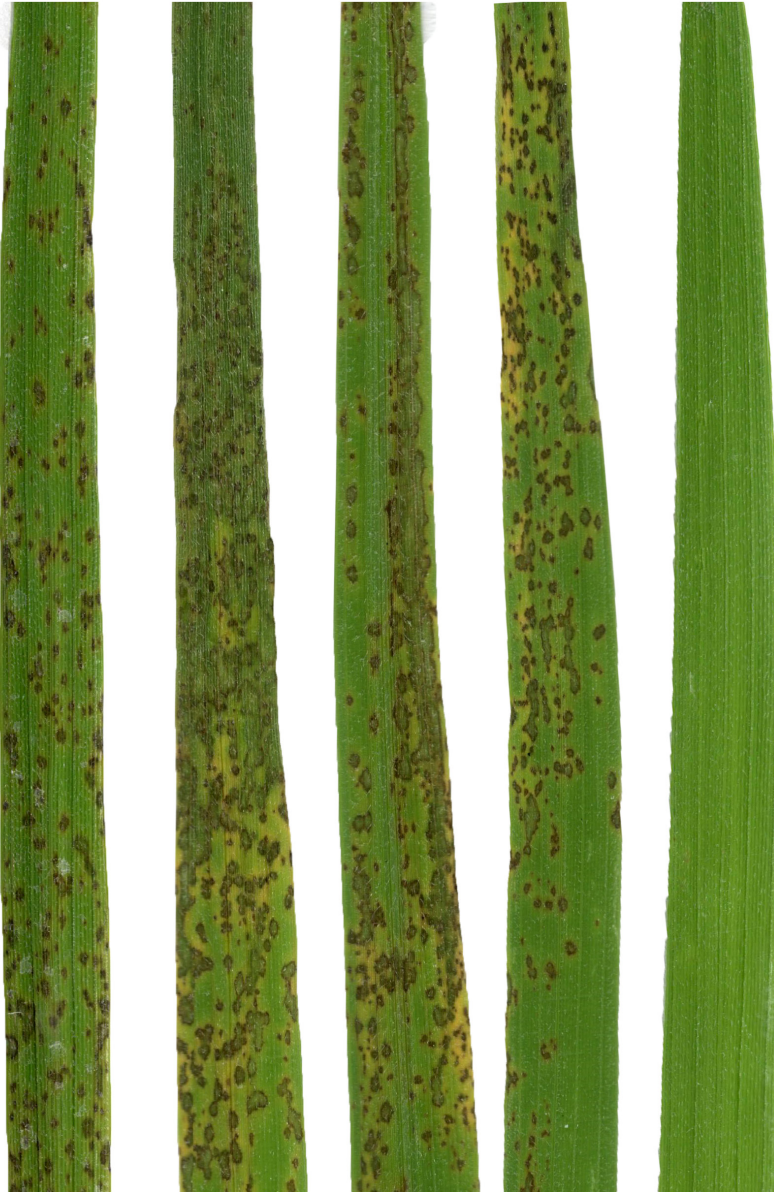

**Figure 3. Control that GFP-MoCKa, GFP-MoCKb1 and GFP-MoCKb2 are as pathogenic as the background Ku80. CK is untreated control.**

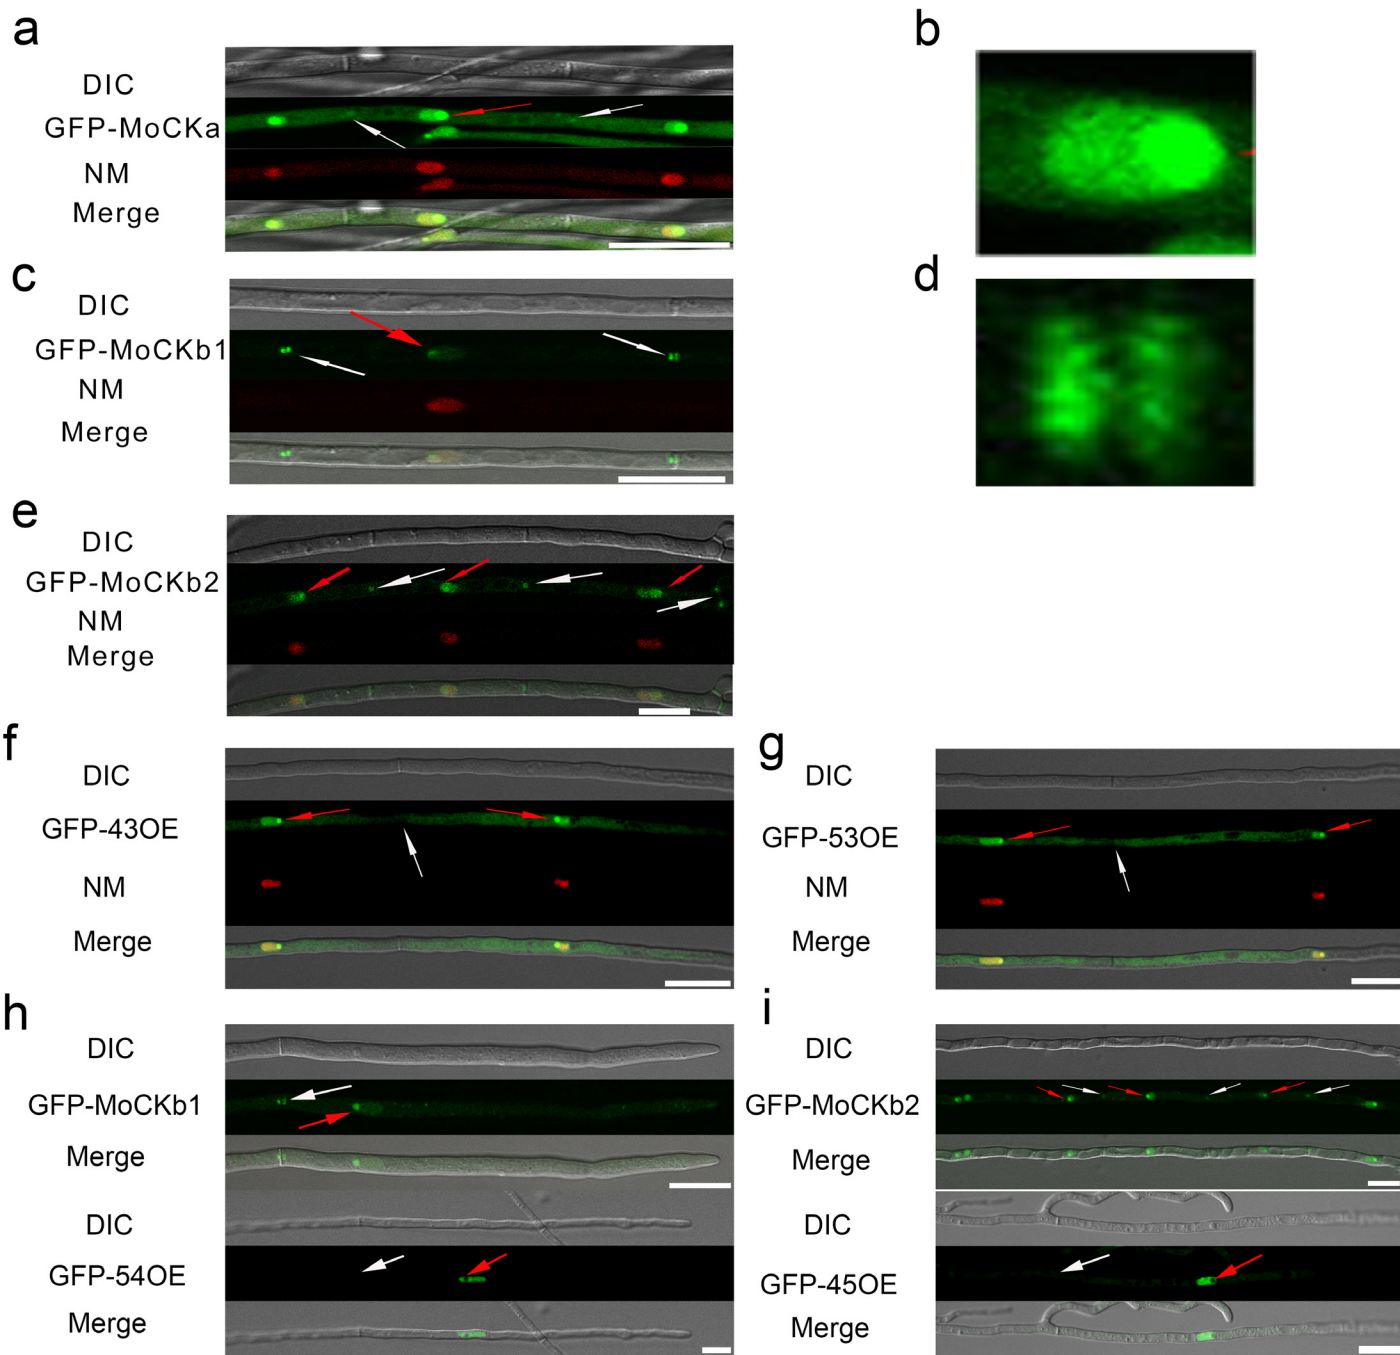

**Figure 4. Intracellular localization of the three CK2 holoenzyme components showing that all three proteins are needed for normal localization.** **a-e**, Localization of the three MoCK2 subunits in the background strain Ku80. The background strain Ku80 was transformed through gene replacements using plasmids containing GFP-MoCKa, GFP-MoCKb1 and GFP-MoCKb2. All three GFP constructs localize preferentially to nucleoli and to septal pores between cells. **b**, Enlargement of the nuclear localization of GFP-MoCKa (marked with red arrow in **a**). **d**, Enlargement of the septal localization of GFP-MoCKb1 (left septa marked with white arrow in **c**) **f** and **g**, Localization of over expressed GFP-MoCKa in  $\Delta Mockb1$  (43OE-GFP) or in  $\Delta Mockb2$  (53OE-GFP) does not rescue normal localization to septal pores. **h** and **i**, (below) Neither overexpression of MoCKb1 in  $\Delta Mockb2$  (54OE-GFP) nor overexpression of MoCKb2 in  $\Delta Mockb1$  (45OE-GFP) rescued normal localization (GFP-MoCKb1 and GFP-MoCKb2) (above) to nucleoli or septal pores. Histone linker (MGG\_12797) was fused with the mCherry and used as nuclear localization marker (NM). All bars=10mm.

**Figure 4 Supplement 1.**  
**GFP-MoCKa localization in conidia.**

*Magnaporthe oryzae*  
conidia.

GFP-MoCKa localizes to nuclei  
(red arrows) and to septal  
pores (white arrows). White  
bar is 10  $\mu\text{m}$ .

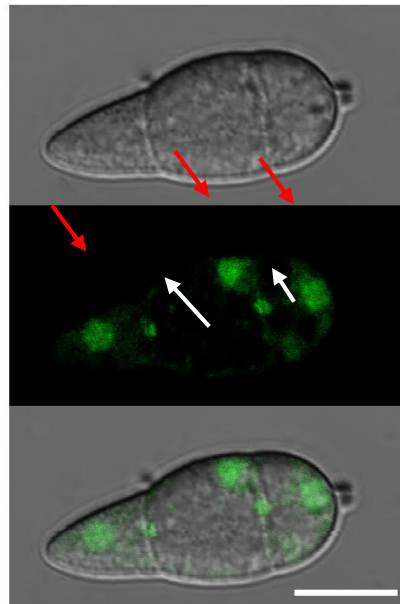

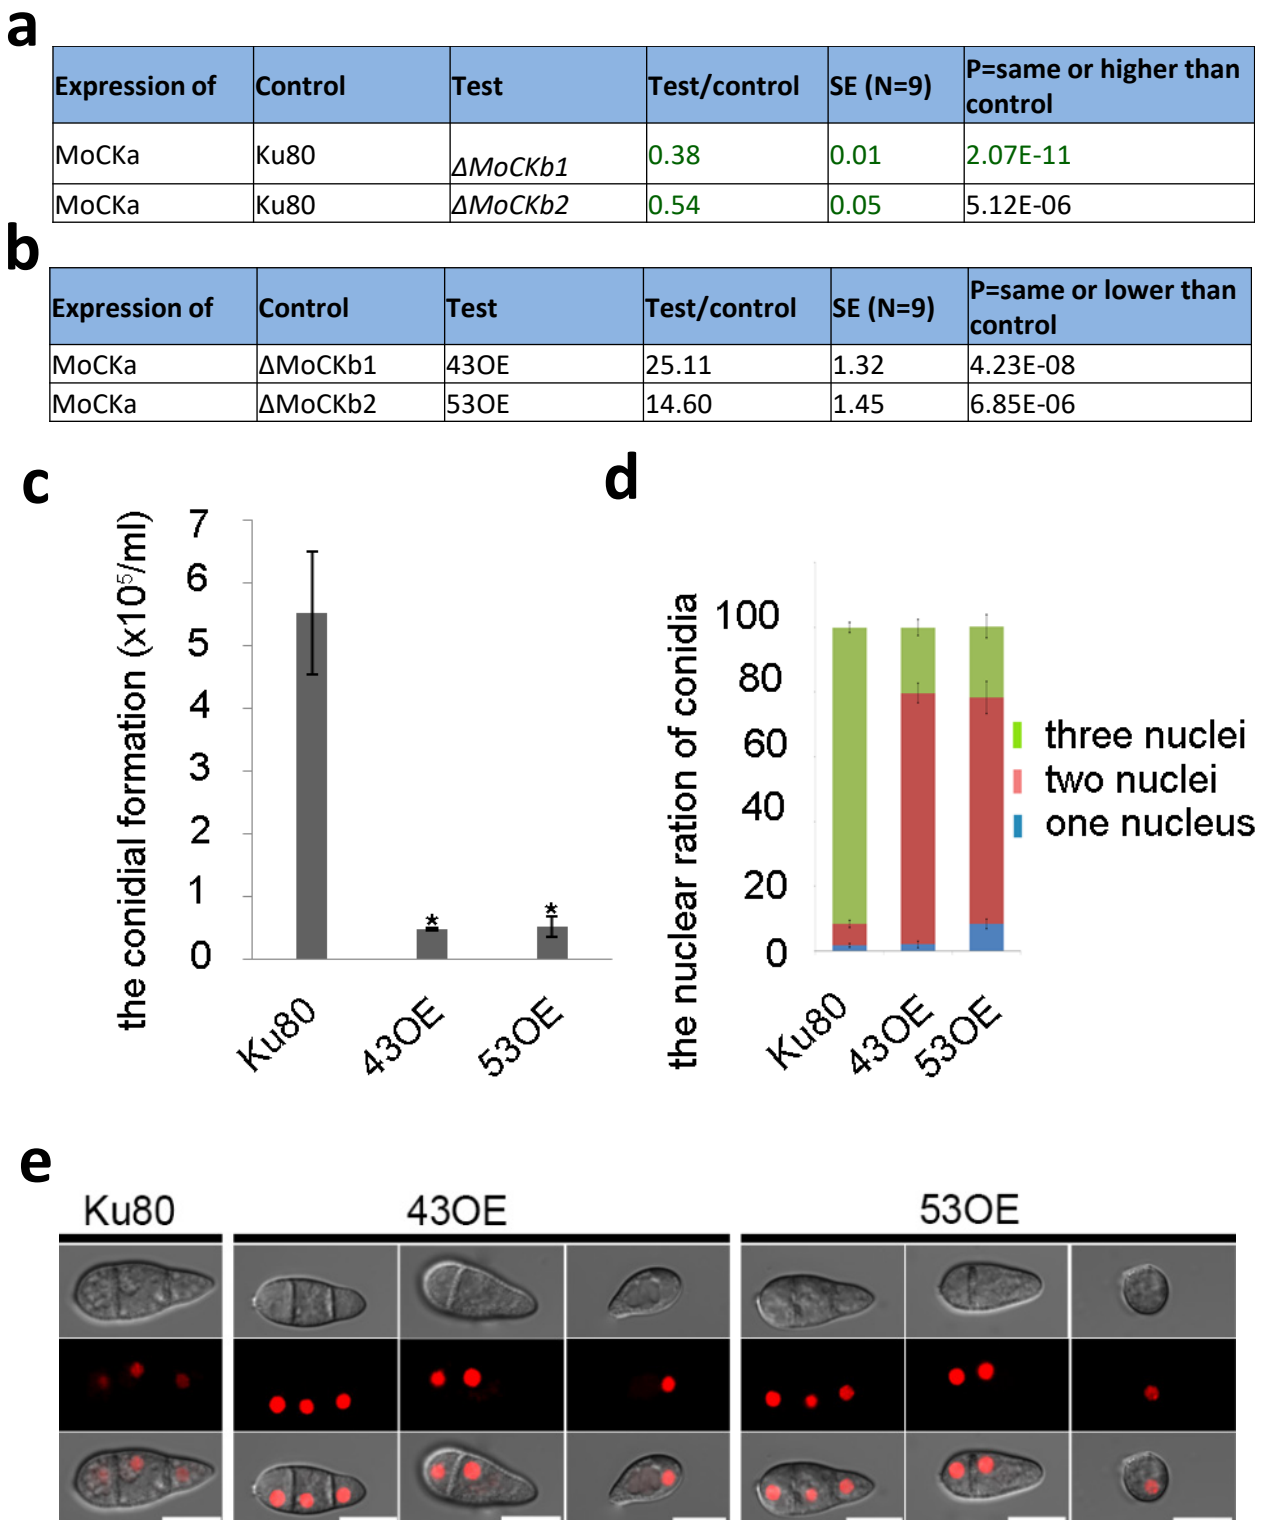

**Figure 5. Overexpression of MoCKa in the MoCKb deletion mutants and the effect of this on conidia morphology.** (a) MoCKa expression in the  $\Delta MoCKb1$  and  $\Delta MoCKb2$  deletion relative to the MoCKa expression in the control Ku80 showing that expression of the two CKb were both reduced in the deletion mutants (b) The relative expression of MoCKa in the 43OE and 53OE in relation to their respective control backgrounds  $\Delta MoCKb1$  and  $\Delta MoCKb2$ . (c) The conidial forming ability of the 43OE and 53OE transformants compared to the background strain Ku80. (d) The percentage of conidia with different numbers of nuclei produced by the background strain Ku80 and the 43OE and 53OE strains. (e) The conidia morphology of 43OE and 53OE transformants. The red fluorescence was due to the nuclear protein histone linker (MGG\_12797) fused with the mCherry. All bars = 10  $\mu\text{m}$ .

**Figure 5 Supplement 1.** The expression the different overexpressed components of the MoCK2 holoenzyme in the Ku80 background and the deletion mutant background in relation to the expression in respective background. The experiments were repeated three times with triple replications.

| Expression of | Control         | Test       | Test/control | SE (N=9) | P=same or lower than control |
|---------------|-----------------|------------|--------------|----------|------------------------------|
| MoCKa         | Ku80            | GFP-MoCKa  | 15.38        | 0.87     | 8.80E-08                     |
| MoCKb1        | Ku80            | GFP-MoCKb1 | 9.51         | 0.70     | 1.01E-06                     |
| MoCKb2        | Ku80            | GFP-MoCKb2 | 14.64        | 0.85     | 1.14E-07                     |
| MoCKb2        | $\Delta$ MoCKb1 | 45OE       | 12.63        | 1.35     | 1.26E-05                     |
| MoCKb1        | $\Delta$ MoCKb2 | 54OE       | 45.47        | 2.52     | 5.43E-08                     |

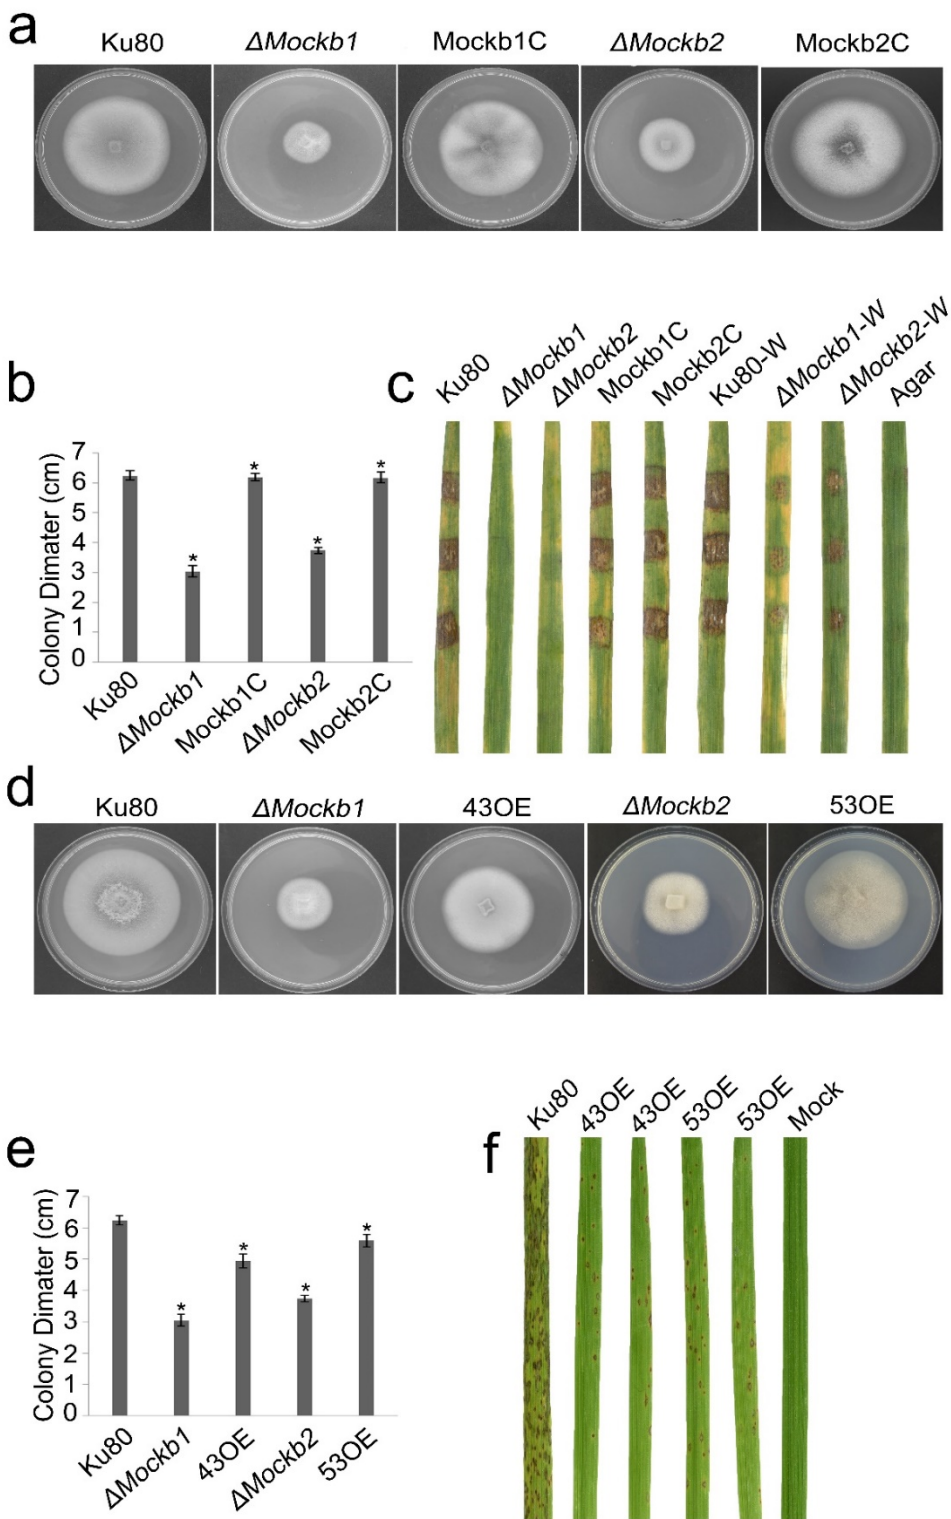

**Figure 6. Intact CK2 holoenzyme is needed for normal growth, infection, pathogenicity.** **a**, Colonial morphology and **b**, vegetative growth of  $\Delta$ Mockb1 and  $\Delta$ Mockb2 deletion mutants and their respective complementation strains was observed on SYM agar plates incubated in the dark for 10 days at 25°C, and then photographed. **c**,

Pathogenicity analysis of  $\Delta$ Mockb1 and  $\Delta$ Mockb2 on rice. Disease symptoms on rice leaves of 2-week-old seedlings inoculated using mycelial plugs since mutants produced no or very few conidia. Typical leaves were photographed 6 days after inoculation. The Mockb1C and Mockb2C were complementary strains. Treatments ending with a W indicate that the leaf surface was wounded before the plug was applied. The rice cultivar was CO-39. **d**, Colonial morphology and **e**, vegetative growth of  $\Delta$ Mockb1,  $\Delta$ Mockb2, and overexpressed CKa-GFP in the  $\Delta$ Mockb1 (43OE) and in  $\Delta$ Mockb2 (53OE) transformants were observed on SYM medium agar plates incubated in the dark for 10 days at 25°C, and then photographed. **f**, Pathogenicity analysis of overexpressed CKa-GFP in the  $\Delta$ Mockb1 (43OE) and in  $\Delta$ Mockb2 (53OE). Disease symptoms on rice leaves of 2-week-old seedlings inoculated with conidia suspension since CKa overexpressed strains produced just enough conidia to use for the assay. The concentration of conidia in the suspension was about  $1 \times 10^5$ /ml. Typical leaves were photographed 6 days after inoculation. The rice cultivar was CO-39. Error bars shows SE and a star indicate a  $P < 0.05$  for control is same or larger than for the mutants.

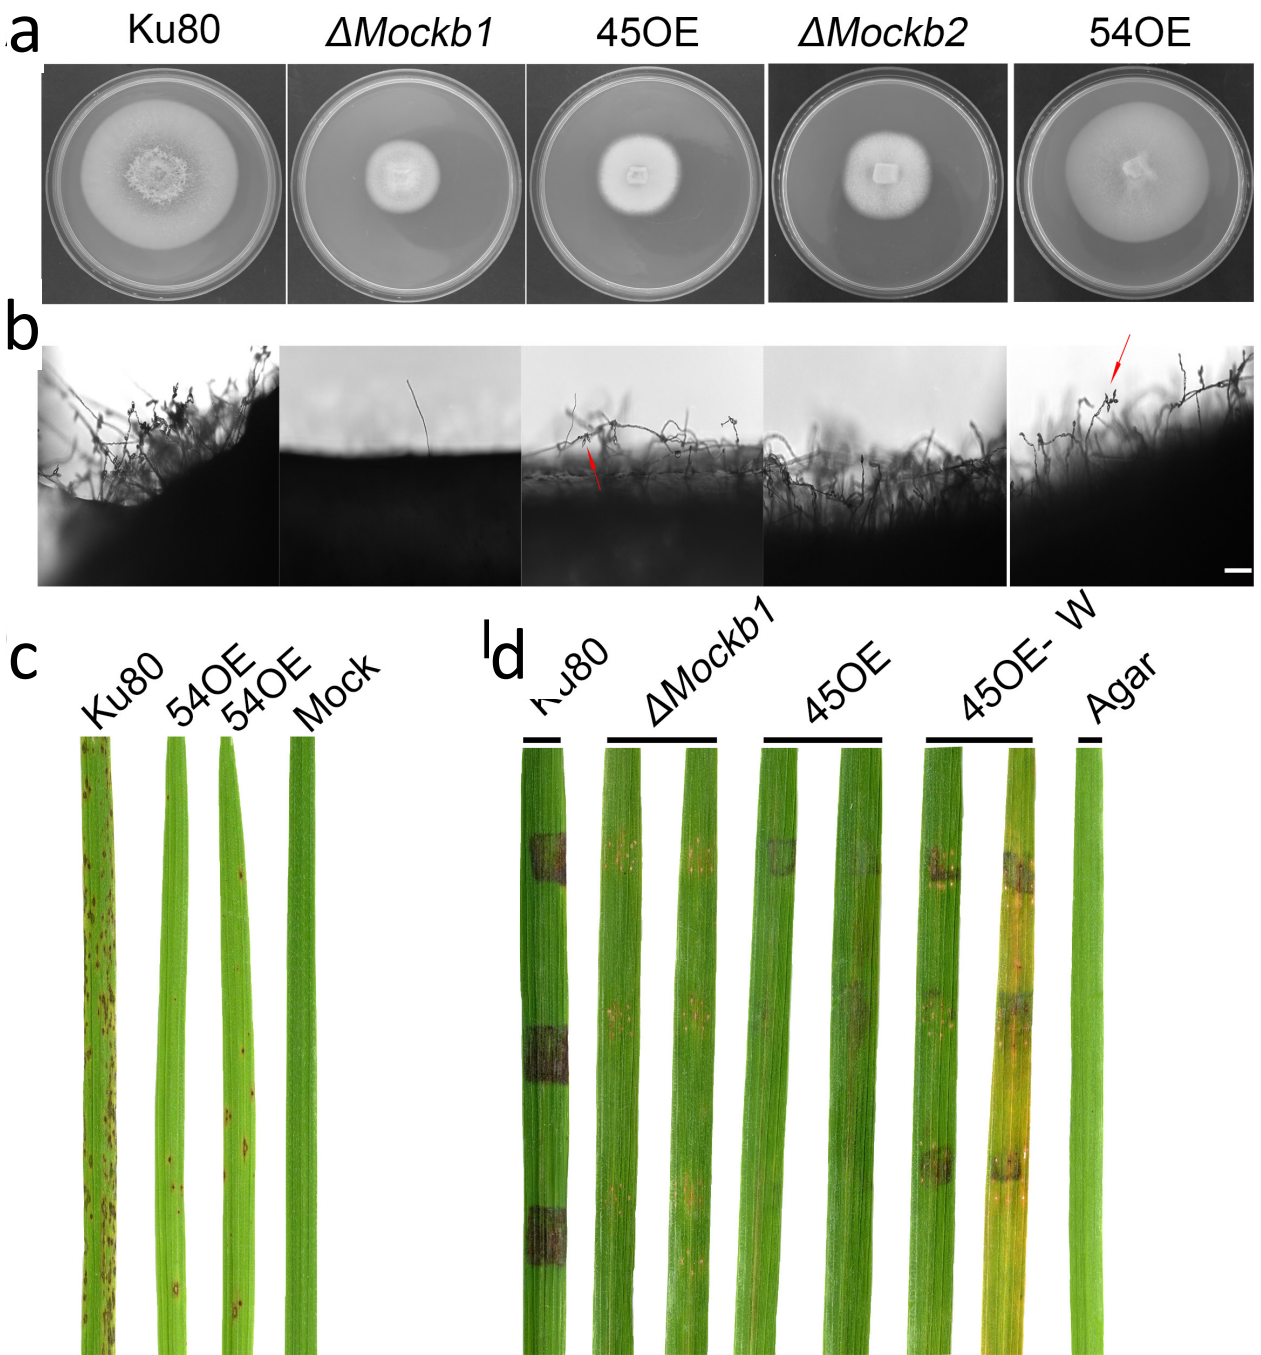

**Figure 6 Supplement 1. Phenotypic effects in the respective *MoCKb* deletion mutants of overexpression the other *MoCKb* component.**

(a and c) Colonial morphology and vegetative growth of  $\Delta Mockb1$ , 45OE transformants,  $\Delta Mockb2$  and 54OE transformants was observed on SYM medium agar plates grown in the dark for 10 days at 25 °C and then photographed.

(b) Development of conidia on conidiophores. Light microscopic observation was performed on strains grown on the rice bran medium for 10 days. The red arrows indicate some conidia are produced by the 45OE and 54OE transformants. Bar=50um.

(c) Pathogenic analysis of 54OE transformants on rice was shown above. Disease symptoms on rice leaves of 2-week-old seedlings were also inoculated by conidia suspension. The concentration of conidia suspension for inoculation was about  $1 \times 10^5$ /ml.

(d) Pathogenic analysis of  $\Delta Mockb1$  and 45OE transformants on rice. Disease symptoms on rice leaves of 3-week-old seedlings were also inoculated using mycelial plugs. The 45OE-W indicates that the rice leaves were wounded. Typical leaves were photographed 6 days after inoculation. The rice strain was CO-39.

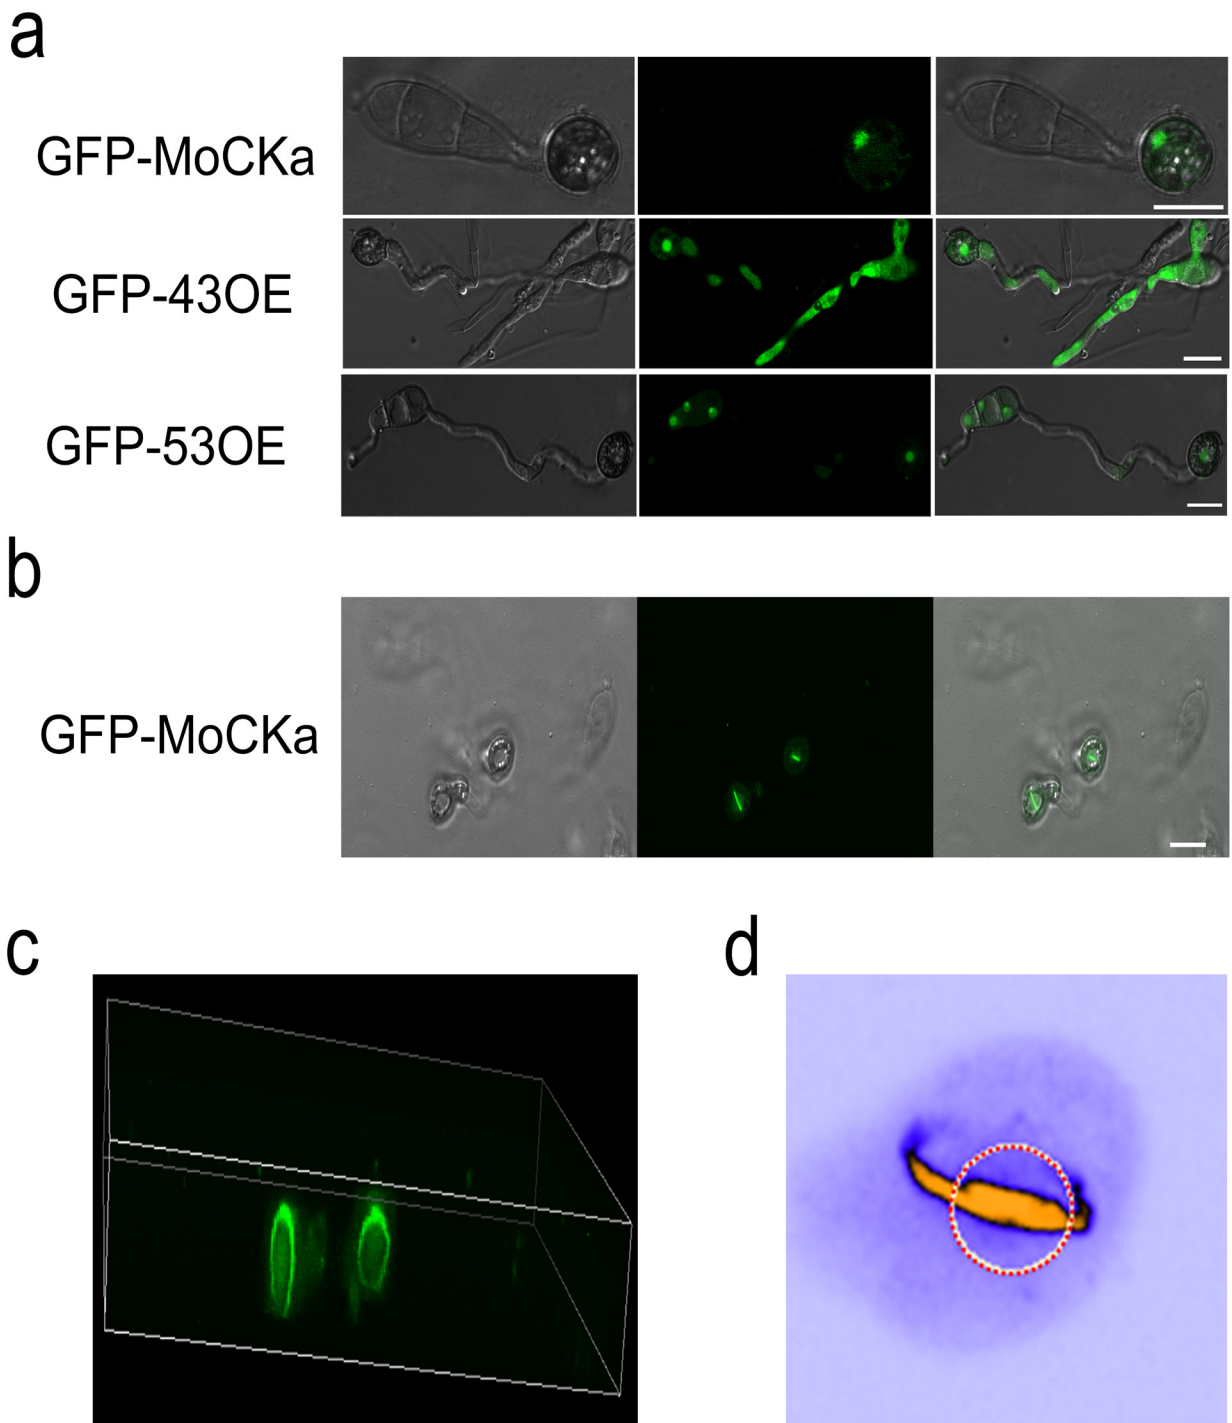

**Figure 7. Localization of the GFP-MoCKa subunit in appressoria of the background strain Ku80 the**

**and in the two MoCKb deletion strains (43OE-GFP and 53OE-GFP) (compare Fig. 1a, f, g). a,**

Localization of GFP-MoCKa in all three strains show localization to nuclei. **b,** In the background strain Ku80 that form appressoria from conidia a bright line of GFP-MoCKa can be seen across the appressorium penetration pores. **c.** Through 3d scanning and then rotating the 3d reconstruction image ([Link to Movie 1](#))

we found that the streak across the penetration pores is a ring of GFP-MoCKa perpendicular to the penetration pore opening not present in the deletion strains ([Link to Movie 2 and 3](#)).

**d,** False colour lookup table 3d reconstruction image of the right ring structure in **c** enlarged and rotated back and seen from the same angle as in **b** with the penetration pore opening indicated by a red-white circle seen from the “plant” side ([Link to Movie 4 and 5](#) for left and right ring in false colours). The false colour was used so that the weak fluorescence in the cytoplasm could be used to show the whole cytoplasm volume. The image was made using the analytical image analysis freeware ImageJ (<https://imagej.nih.gov/ij/index.html>) and the ICA lookup table in ImageJ was used for false colouring. **e,** Measurements of the sizes of the GFP-MoCKa rings in seen in **c**. All bars=10 mm.

**e,** Measurements of the sizes of the GFP-MoCKa rings in seen in **c**. All bars=10 mm.



## Figure 7 Supplement 1. GFP-MoCKa localization in appressoria.

*Magnaporthe oryzae* appressoria. Image in the 3d stack (left appressorium in Fig. 3b,d) that shows the septal pore accumulation. Image deliberately "overexposed" to be able to show nuclear and septal localization.

GFP-MoCKa localizes to nuclei (red arrow) surrounded by the MoCK-HRS in cross-section (blue arrows) and to the septal pore towards the germtube (white arrow). White bar is 10  $\mu\text{m}$ .

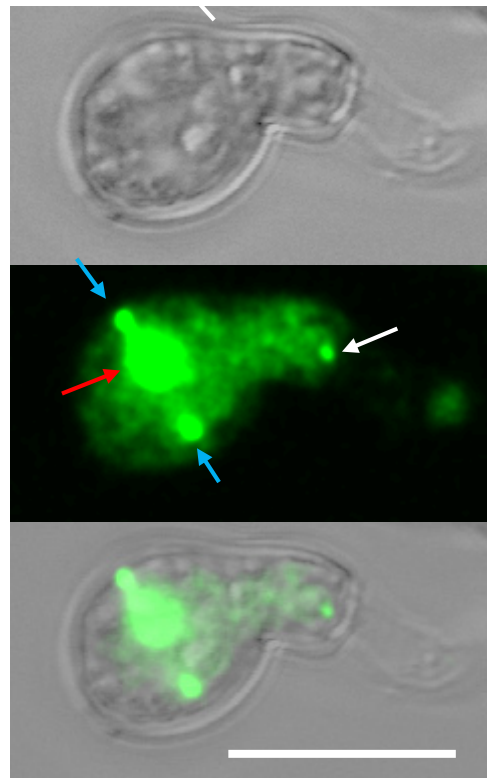

Figure 7 Supplement 2.

| MoCK2 Rings                           | Right | Left |
|---------------------------------------|-------|------|
| Measurements from images              | um    | um   |
| Outer diameter                        | 5.3   | 5.5  |
| Max thickness at penetration pore     | 1.4   | 1.2  |
| Thickness on sides and away from pore | 0.7   | 0.7  |
| Thickness seen from side              | 0.7   | 0.7  |

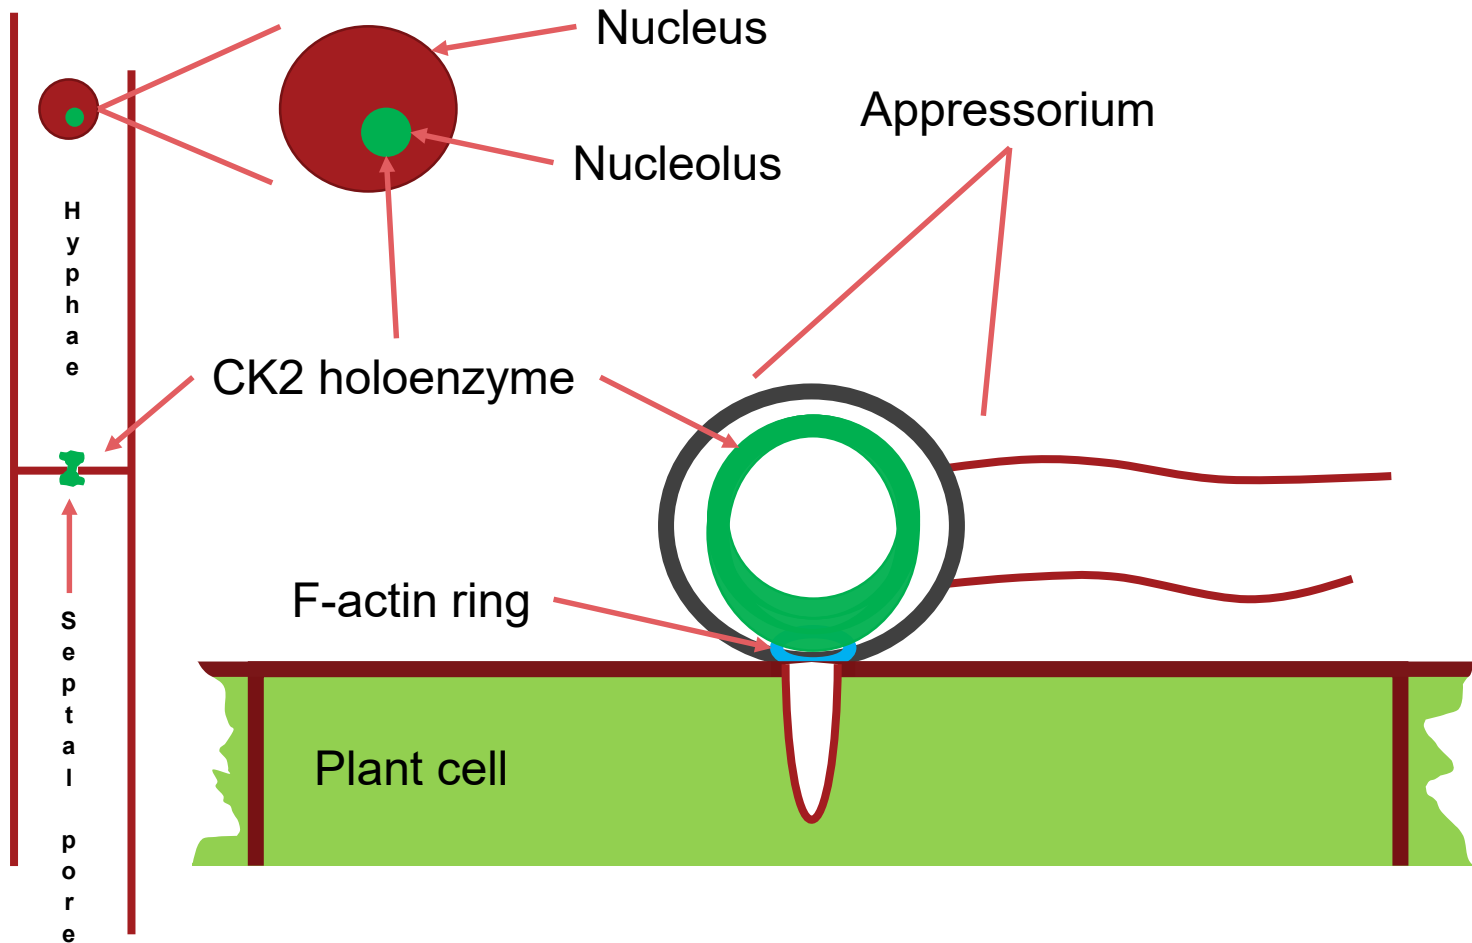

**Figure 8. Schematic drawing of the main localizations of the CK2 holoenzyme.** It localizes to the nucleolus, to septal pores between cells and forms a CK2-Holoenzyme Ring Structure (CK2-HRS) perpendicular to the F-actin ring surrounding the appressorium penetration pore. Appressorium and hyphae drawn approximately to their relative sizes.

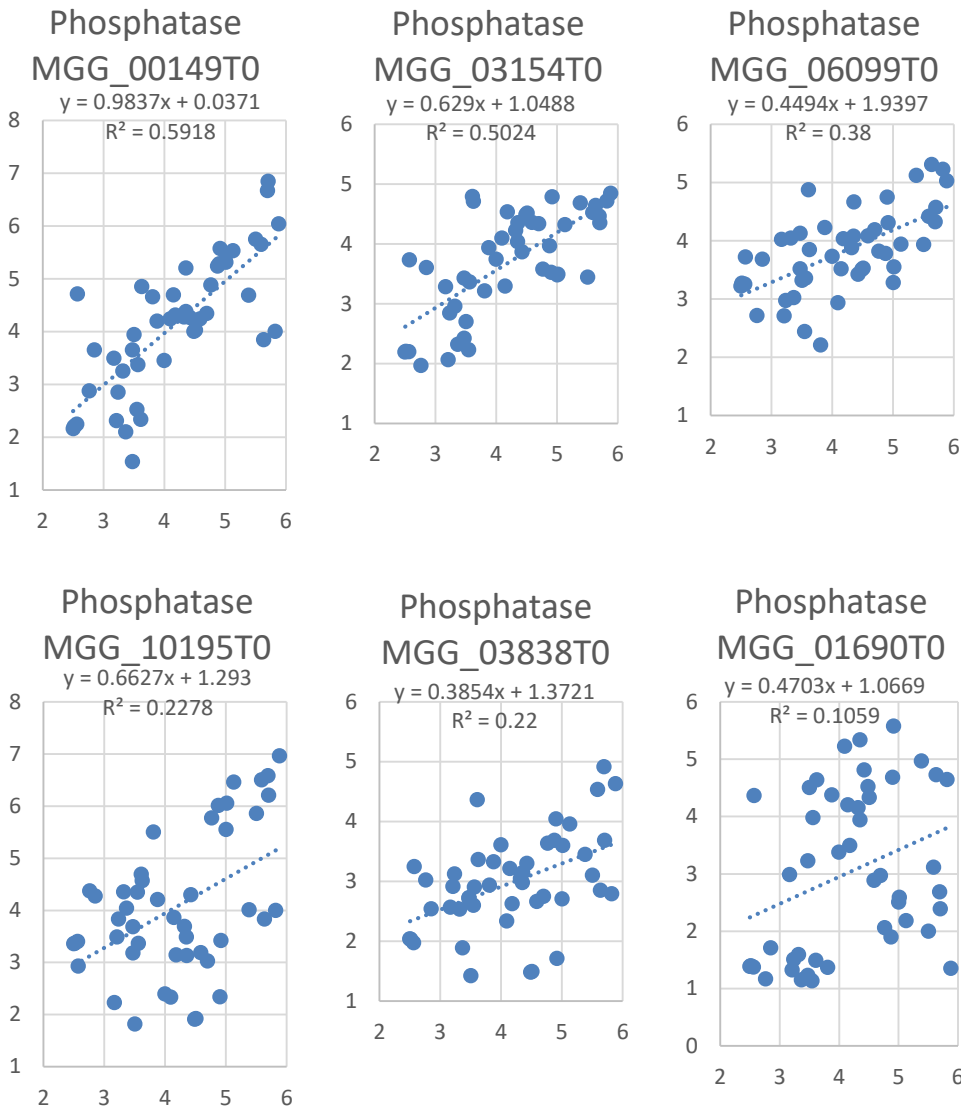

Figure 9. Plots of 6 putative serine/threonine protein phosphatase expression (y-axis) vs MoCKa expression (x-axis) in a range of transcriptome datasets from different experiments (Note: Log2 scale on axes and grids are represented with fixed "aspect ratio" to highlight the different slopes of the correlations). MGG\_01690 is not in the pulldown while the other five are and used to illustrate that all S/T phosphatases are not correlated with CKa. The P values for the Null hypothesis of no correlation with CKa are: MGG\_00149 P=2.7E-10, MGG\_03154 P=2.5E-8, MGG\_06099 P=4.0E-6, MGG\_10195 P=6.9E-4, MGG\_03838 P=8.8E-4, MGG\_01690 P=2.6E-2

Transcriptomic data was downloaded from public websites so as to be able to test the relationship under many different growth conditions in many experiments.

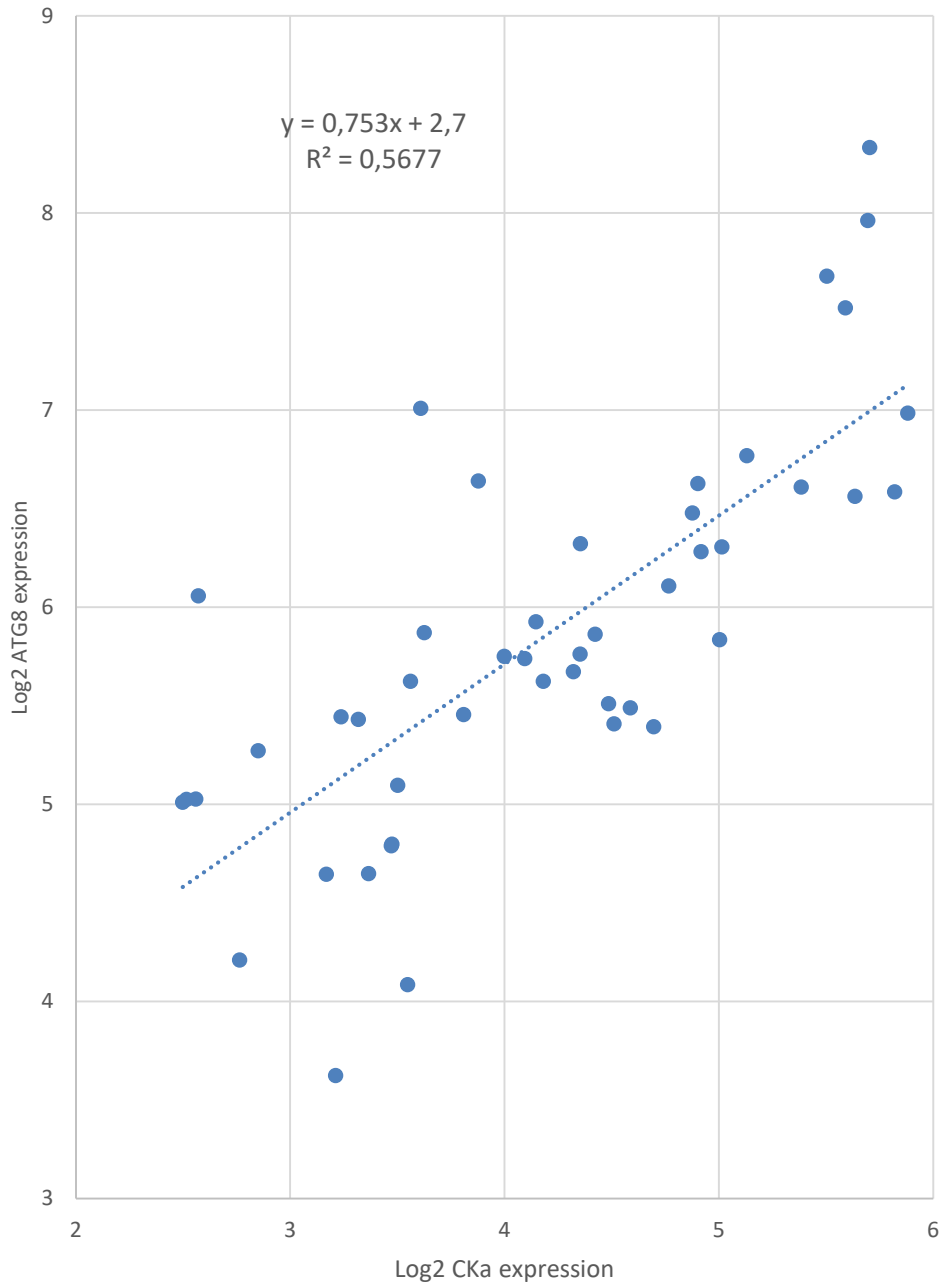

Figure 10 Plot of MoAtg8 (autophagy) expression vs MoCkA expression in a range of transcriptomes from different experiments (Note: Log2 scale on axes and grids are represented with fixed "aspect ratio" to highlight the slope of the correlation). P value for the Null hypothesis that there is no correlation = 9.9E-10. Transcriptomic data was downloaded from public websites so as to be able to test the relationship under many different growth conditions in many experiments.

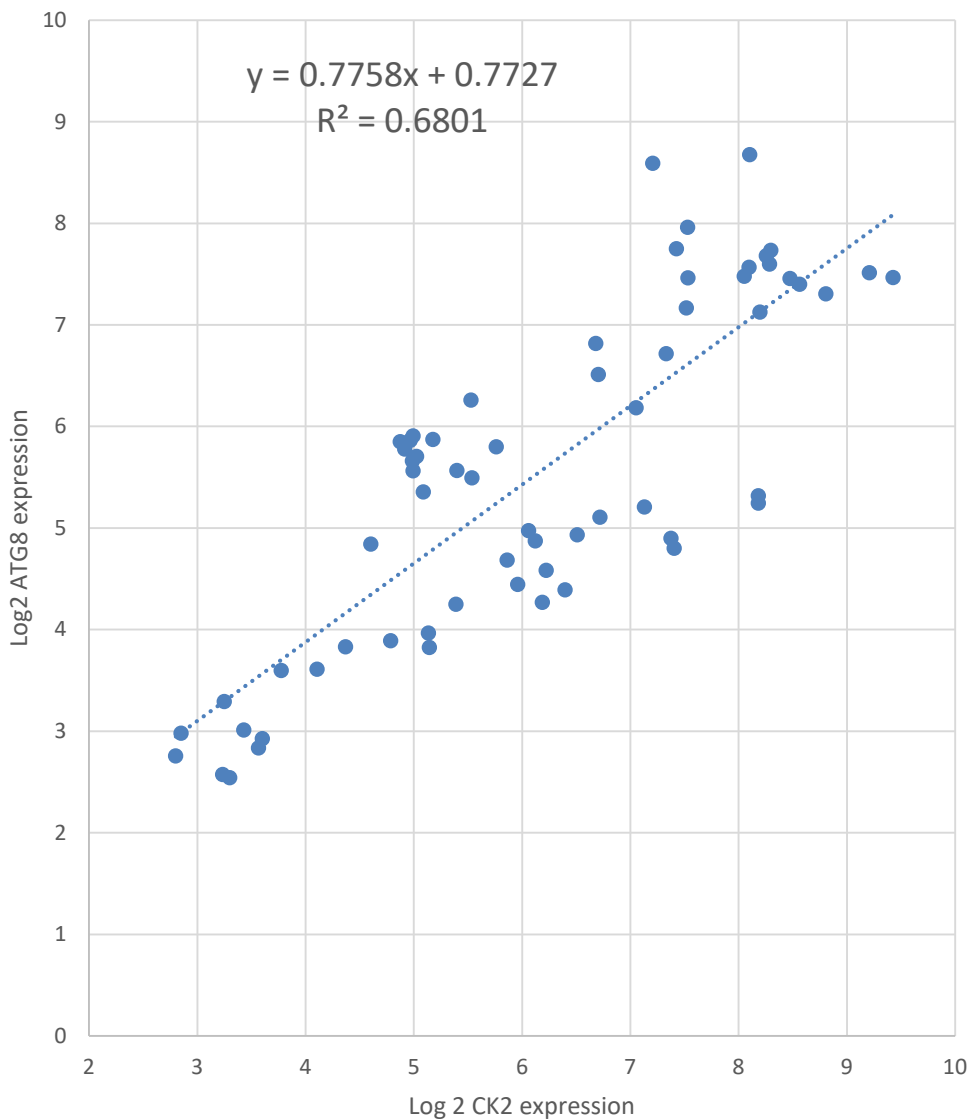

Figure 10 Supplement1. Plot of FgAtg8 (autophagy) expression vs FgCKa expression in a range of transcriptomes from different experiments. (Note: Log<sub>2</sub> scale on axes and grids are represented with fixed "aspect ratio" to highlight the slope of the correlation). P value for the Null hypothesis that there is no correlation = 5.5E-17. Transcriptomic data was downloaded from public websites so as to be able to test the relationship under many different growth conditions in many experiments.

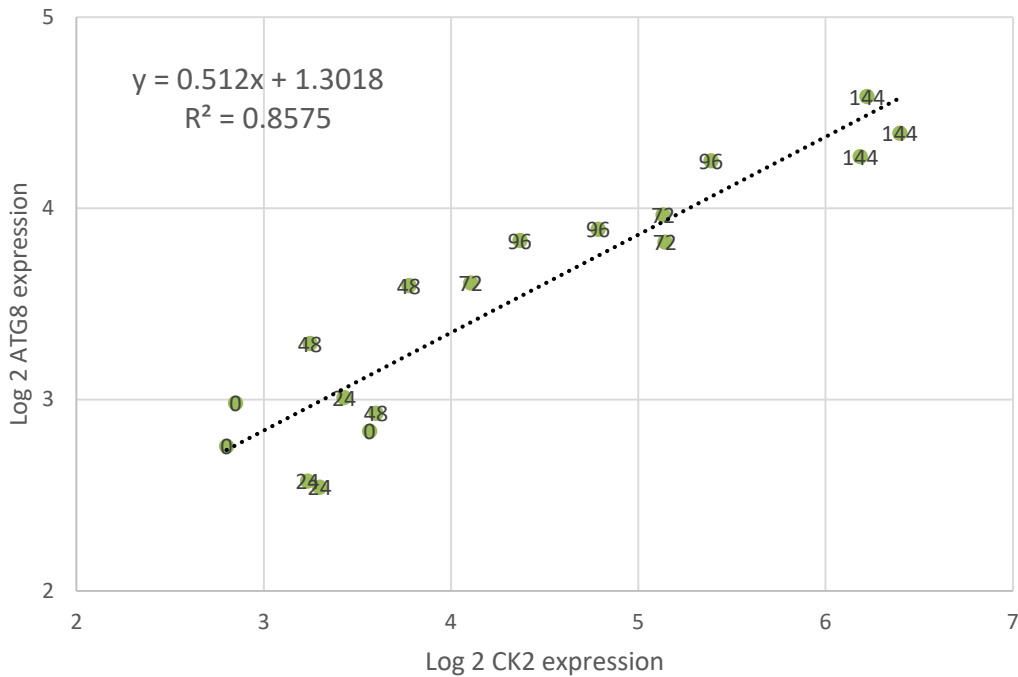

Figure 10 Supplement 2. Plot of FgAtg8 (autophagy) expression vs FgCKa expression in a times series infection experiment with 3 replicates where numbers in the plot indicate hours post infection (hpi). (Note: Log<sub>2</sub> scale on axes and grids are represented with fixed "aspect ratio" to highlight the slope of the correlation). P value for the Null hypothesis that there is no correlation = 3.6E-08 . Transcriptomic data was downloaded from public websites so as to be able to test the relationship under many different growth conditions in many experiments.

**Table 1 Background and mutant strains of *M. oryzae* used in this study**

| Strains                | Genotype description                                                                 | Reference  |
|------------------------|--------------------------------------------------------------------------------------|------------|
| Ku80                   | <i>ku80</i> deletion mutant of Guy11 (Background strain in this study)               | 35         |
| $\Delta$ <i>Mockb1</i> | <i>Mockb1</i> deletion mutant of <i>Ku80</i>                                         | This study |
| $\Delta$ <i>Mockb2</i> | <i>Mockb2</i> deletion mutant of <i>Ku80</i>                                         | This study |
| Mockb1C                | $\Delta$ <i>Mockb1</i> transformed with the wild-type MoCKb1 protein                 | This study |
| Mockb2C                | $\Delta$ <i>Mockb2</i> transformed with the wild-type MoCKb2 protein                 | This study |
| 53OE                   | $\Delta$ <i>Mockb2</i> transformed with the over-expressed GFP-MoCKa fusion protein  | This study |
| 43OE                   | $\Delta$ <i>Mockb1</i> transformed with the over-expressed GFP-MoCKa fusion protein  | This study |
| 54OE                   | $\Delta$ <i>Mockb2</i> transformed with the over-expressed GFP-MoCKb1 fusion protein | This study |
| 45OE                   | $\Delta$ <i>Mockb1</i> transformed with the over-expressed GFP-MoCKb2 fusion protein | This study |
| GFP-MoCKa              | Ku80 transformed with the over-expressed GFP-MoCKa fusion protein                    | This study |
| GFP-MoCKb1             | Ku80 transformed with the over-expressed GFP-MoCKb1 fusion protein                   | This study |
| GFP-MoCKb2             | Ku80 transformed with the over-expressed GFP-MoCKb2 fusion protein                   | This study |



**Table 2 Primers used in this study**

| Primer name | The sequence of primer (5' → 3')                  |
|-------------|---------------------------------------------------|
| 3696qRTF    | CGTCAACTACCAGAAATGCG                              |
| 3696qRTR    | TGACGGAGTCTTGCTCTGTG                              |
| 446qRTF     | GCAGAGGTGTCCGAGGAAT                               |
| 446qRTR     | CCAAGATCATCTCCAGTGCC                              |
| 5651qRTF    | ACCCGTTGCTGCCGATGG                                |
| 5651qRTR    | TAGACCTGGAAGAGGATGTTGTGG                          |
| Tub1RTF     | CAACATCCAGACCGCTCTC                               |
| Tub1RTR     | ACCGACACGCTTGAACAG                                |
| 446AF       | GCCCAACCTTTCATCCTA                                |
| 446AR       | TTGACCTCCACTAGCTCCAGCCAAGCCTACCTCCAGTGCCTCCTT     |
| 446BF       | GAATAGAGTAGATGCCGACCGCGGGTTCTCGTCCAACCTCTAAACTAAC |
| 446BR       | GCTGGGTAAACATCTCATT                               |
| 5651AF      | GGGGTACCCCTCTAAGTGGTCGTGC                         |
| 5651AR      | CCGGAATTCCTTGGATGGAATTGTGCC                       |
| 5651BF      | CGCGGATCCAGGGAGGCGTTATCATTTA                      |
| 5651BR      | TAATCTAGACAGAGCCGAGCTTGTCTA                       |
| 446comF     | GCTCTAGAGCGGAACCAGTAGTTGACGG                      |
| 446comR     | GGGGTACCCATGACAACGCCGAGGG                         |
| 5651comF    | GCTCTAGAGCCCGACAAGCACAAAAGAT                      |
| 5651comR    | CCCCCGGGAGCGTTCGTTTAGACCC                         |
| 3696GFPF    | CGGGATCCATGCACAGCATGGCACGC                        |
| 3696GFPR    | CGGAATTCTGTTGAAATTACCAGCGATTC                     |
| 5651GFPF    | CGGGATCCATGGAAGATTTTGGCAGCG                       |
| 5651GFPR    | CCCTCGAGTCAGACACCTTGCATCATG                       |
